# Supplementary material for: Management of Atopic Dermatitis Via Oral and Topical Administration of Herbs in Murine Model: A Systematic Review
Source: PubMed Central journal article supplement (PMC9171034; doi:10.3389/fphar.2022.785782), 2022-05-24
Supplement: Table1.pdf [file Table1.pdf]

**Supplementary Table 1:** Study parameters and suggested mechanism (s) of the included oral administration of herb and their active constituents' studies.

| Herb Name                                           | Sample Type                            | Experimental Outcomes                                                                                                                             | Proposed Mechanism                                                                                                               | References |
|-----------------------------------------------------|----------------------------------------|---------------------------------------------------------------------------------------------------------------------------------------------------|----------------------------------------------------------------------------------------------------------------------------------|------------|
| <i>Angelica gigas</i> Nakai                         | Ethanollic extract (Dried whole plant) | ↓dermatitis severity<br>↓serum IgE<br>↓serum IL-6<br>↓serum & tissue TNF- $\alpha$<br>↓serum histamine<br>↓MAPKs phosphorylation (ERK, JNK & p38) | Suppression of both Th1 & Th2 cytokines via inhibition of MAPK & NF- $\kappa$ B signaling pathways                               | (102)      |
| <i>Artemisia caruifolia</i> Buch. -Ham. ex Roxb.    | Ethanollic extract (Dried whole plant) | ↓dorsal skin thickness<br>↓skin lesions<br>↓ear thickness                                                                                         | Restoration in dorsal skin thickness and restrained edema in ear and skin<br><br>Analysis on signaling pathway was not performed | (144)      |
| <i>Ribes fasciculatum</i> var. <i>chinense</i> MAX. | Ethanollic extract (Roots)             | ↓serum IgE                                                                                                                                        | Suppression of serum IgE level<br><br>Analysis on signaling pathway was not performed                                            | (54)       |
| <i>Sanguisorba officinalis</i> L. (Rosacease)       | Ethanollic extract (Roots)             | ↓mast cell count<br>↓serum IgE<br>↓skin eosinophils<br>↓scratching frequency<br>↓epidermal thickness                                              | Suppression of mast cell count & IgE level<br><br>Analysis on signaling pathway was not performed                                | (146)      |
| <i>Poria cocos</i> F.A. Wolf                        | Ethanollic extract (Bark)              | ↓dermatitis severity<br>↓tissue IL-4<br>↑tissue IL-10 (anti-inflammatory)<br>↓epidermal thickness                                                 | Suppression of one Th2 cytokine (IL-4) but enhancement of another Th2 cytokine (IL-10)                                           | (6)        |

|                                                             |                                           |                                                                                                                                                                                                                                                                                                      |                                                                                                                                |       |
|-------------------------------------------------------------|-------------------------------------------|------------------------------------------------------------------------------------------------------------------------------------------------------------------------------------------------------------------------------------------------------------------------------------------------------|--------------------------------------------------------------------------------------------------------------------------------|-------|
|                                                             |                                           |                                                                                                                                                                                                                                                                                                      | Analysis on signaling pathway was not performed                                                                                |       |
| <i>Salvia plebeia</i> R. Br.<br>(Lamiaceae)                 | Ethanollic extract<br>(Dried whole plant) | ↓mast cell count<br>↓serum IgE<br>↓skin eosinophils<br>↓tissue TNF- $\alpha$ , IFN- $\gamma$ , IL-4, IL-13, IL-31 & Th17<br>↓epidermal & dermal thickness<br>↓serum histamine                                                                                                                        | Suppression of both Th1 & Th2 cytokines<br><br>Analysis on signaling pathway was not performed                                 | (20)  |
| <i>Helianthus tuberosus</i> L.                              | Ethanollic extracts<br>(Tubers)           | ↓dermatitis severity<br>↓mast cell count<br>↓serum IgE, IL-6<br>↓tissue TNF- $\alpha$<br>↓serum histamine<br>↓epidermal thickness<br>↓ICAM-1 and VCAM-1 expression<br>↑filaggrin expression                                                                                                          | Suppression of both Th1 & Th2 cytokines and restoration of skin barrier<br><br>Analysis on signaling pathway was not performed | (58)  |
| <i>Tabebuia avellanedae</i><br>Lorentz ex Griseb.           | Ethanollic extract<br>(N/A)               | ↓dermatitis severity<br>↓serum IgE, IL-4 & IFN- $\gamma$<br>↓tissue mRNA IL-4, IL-5 & IFN- $\gamma$<br>No significant changes of IL-12<br>↓mRNA IL-4, IL-5, IFN- $\gamma$ & IL-12<br>↓epidermal thickness<br>↓serum histamine<br>↓Syk/NF $\kappa$ B pathway                                          | Suppression of both Th1 & Th2 cytokines via inhibition of NF- $\kappa$ B signaling pathway                                     | (108) |
| <i>Artemisia argyi</i> H. Lév.<br>& Vaniot                  | Ethanollic extract<br>(N/A)               | ↓skin lesions<br>↓serum IgE, IL-1 $\beta$ , IL-4, IL-6<br>↓mRNA IL-4, IL-6, IFN- $\gamma$ , IL-1 $\beta$ , TNF- $\alpha$ & GM-CSF<br>↓serum histamine<br>↓tissue TGF- $\beta$ 1 expression<br>↓Lyn, Syk, PI3K/Akt & I $\kappa$ B $\alpha$ phosphorylation<br>↓MAPKs phosphorylation (ERK, JNK & p38) | Suppression of both Th1 & Th2 cytokines via inhibition of MAPKs signaling pathway                                              | (34)  |
| <i>Persicaria tinctoria</i><br>(Aiton) Spach<br>(Naju Jjok) | Distilled water extract                   | ↓dermatitis severity<br>↓serum IgE<br>↓mRNA TSLP, IL-4, IFN- $\gamma$<br>↓mRNA IL-6, TNF- $\alpha$ , TARC                                                                                                                                                                                            | Suppression of both Th1 & Th2 cytokines                                                                                        | (35)  |

|                                                                      |                                 |                                                                                                                                                                                                                                                                                                                                |                                                                                                                   |       |
|----------------------------------------------------------------------|---------------------------------|--------------------------------------------------------------------------------------------------------------------------------------------------------------------------------------------------------------------------------------------------------------------------------------------------------------------------------|-------------------------------------------------------------------------------------------------------------------|-------|
|                                                                      | (Dried whole plant)             | <p>↓protein IL-4 &amp; IL-6</p> <p>↓serum IL-4</p> <p>↓caspase-1 expression</p> <p>No significant changes in the scratching &amp; serum histamine</p>                                                                                                                                                                          | Analysis on signaling pathway was not performed                                                                   |       |
| <i>Angelica dahurica</i> (Hoffm.) Benth. & Hook.f. ex Franch. & Sav. | Distilled water extract (N/A)   | <p>↓mast cell count</p> <p>↓serum IgE, IL-6, IL-10 &amp; IL-12</p> <p>↓CD4+ (total T cells)</p> <p>↓number of WBCs,</p> <p>↓mRNA IL-4, IL-6 &amp; TNF-<math>\alpha</math></p>                                                                                                                                                  | <p>Suppression of both Th1 &amp; Th2 cytokines</p> <p>Analysis on signaling pathway was not performed</p>         | (69)  |
| <i>Ixeris dentata</i> (Thunb.) Nakai                                 | Distilled water extract (N/A)   | <p>↓serum IgE</p> <p>↓MAPKs phosphorylation (ERK, JNK, p38)</p> <p>↓IkBa &amp; NF<math>\kappa</math>B phosphorylation</p>                                                                                                                                                                                                      | Inhibition of MAPKs & NF- $\kappa$ B signaling pathways                                                           | (49)  |
| <i>Panax ginseng</i> C.A. Mey.                                       | Distilled water extract (N/A)   | <p>↓dermatitis severity</p> <p>↓mast cell count</p> <p>↓serum IgE</p> <p>↓blood eosinophils</p> <p>↓ceramidase (enzyme)</p> <p>↓TSLP, IL-6 &amp; TNF-<math>\alpha</math>, TARC</p> <p>↓epidermal thickness</p> <p>↓MAPKs phosphorylation (ERK, JNK &amp; p38)</p> <p>↑filaggrin levels</p> <p>↓TEWL</p> <p>↑skin hydration</p> | Suppression of both Th1 & Th2 cytokines via inhibition of MAPKs signaling pathway and restoration of skin barrier | (109) |
| <i>Panax ginseng</i> Meyer                                           | Water extract (Roots)           | <p>↓serum IgE, IL-6</p> <p>↓tissue TARC &amp; MDC</p> <p>↓MAPKs phosphorylation (ERK, JNK &amp; p38)</p> <p>↓IkBa &amp; NF<math>\kappa</math>B expression</p>                                                                                                                                                                  | Suppression of Th2 cytokines via inhibition of MAPKs & NF- $\kappa$ B signaling pathways                          | (60)  |
| <i>Polygala tenuifolia</i> Willd.                                    | Distilled water extract (Roots) | <p>↓dermatitis severity</p> <p>↓serum IgE</p> <p>↓mRNA TNF-<math>\alpha</math> &amp; IL-4</p> <p>↓scratching frequency</p> <p>↓serum histamine</p> <p>↓epidermal thickness</p>                                                                                                                                                 | <p>Suppression of both Th1 &amp; Th2 cytokines</p> <p>Analysis on signaling pathway was not performed</p>         | (126) |
| <i>Liriope muscari</i> (Decne.) L.H. Bailey                          | Water extract (Roots)           | <p>↓mast cell count</p> <p>↓serum IgE</p> <p>↓epidermal thickness</p>                                                                                                                                                                                                                                                          | Suppression of mast cell count & serum IgE level                                                                  | (72)  |

|                                                                            |                                                   |                                                                                                                                                                                                                                                      |                                                                                                                                                                                                      |       |
|----------------------------------------------------------------------------|---------------------------------------------------|------------------------------------------------------------------------------------------------------------------------------------------------------------------------------------------------------------------------------------------------------|------------------------------------------------------------------------------------------------------------------------------------------------------------------------------------------------------|-------|
|                                                                            |                                                   | <p>↓ear thickness<br/>↓lymph nodes weight</p>                                                                                                                                                                                                        | <p>Analysis on signaling pathway was not performed</p>                                                                                                                                               |       |
| <p><i>Saussurea lappa</i><br/>(Decne.) C.B. Clarke</p>                     | <p>Methanolic extract<br/>(Dried whole plant)</p> | <p>↓mRNA CCR1, IL2R<math>\beta</math><br/>↓mRNA PI3K<math>\alpha</math>, IL20R<math>\beta</math></p>                                                                                                                                                 | <p>Suppression of chemokine (CCR1), interleukins (IL2R<math>\beta</math>, IL20R<math>\beta</math>) &amp; enzyme (PI3K<math>\alpha</math>)</p> <p>Analysis on signaling pathway was not performed</p> | (87)  |
| <p><i>Saussurea lappa</i><br/>(Decne.) C.B. Clarke</p>                     | <p>Methanolic extract<br/>(Dried whole plant)</p> | <p>↓dermatitis severity<br/>↓mast cell count<br/>↓serum IgE<br/>↓plasma TARC<br/>↓epidermal hyperplasia</p>                                                                                                                                          | <p>Suppression of mast cell count, serum IgE &amp; chemokine (TARC)</p> <p>Analysis on signaling pathway was not performed</p>                                                                       | (86)  |
| <p><i>Dendrobium officinale</i><br/>Kimura &amp; Migo</p>                  | <p>Ethyl acetate extract<br/>(Stems)</p>          | <p>↓mast cell count<br/>↓serum IgE<br/>↓epidermal thickness<br/>↓tissue IL-4<br/>↑tissue IFN-<math>\gamma</math><br/>No significant changes of IL-6</p>                                                                                              | <p>Suppression of Th2 cytokines and elevation of Th1 cytokines</p> <p>Analysis on signaling pathway was not performed</p>                                                                            | (137) |
| <p><i>Patrinia scabiosifolia</i><br/>Link</p>                              | <p>DMSO extract<br/>(Dried whole plant)</p>       | <p>↓dermatitis severity<br/>↓serum IgE, AST &amp; ALT<br/>↓tissue IL-4, IL-5, IL-13<br/>↓eotaxin<br/>↓epidermal atrophy, hypertrophy<br/>↓hyperkeratosis<br/>↑filaggrin expression<br/>↓JNK1, JNK2 &amp; NF-<math>\kappa</math>B phosphorylation</p> | <p>Suppression of Th2 cytokines via inhibition of NF-<math>\kappa</math>B signaling pathway and restoration of skin barrier</p>                                                                      | (13)  |
| <p>Byakkokakeishito<br/>• Gypsum<br/>(natural hydrous calcium sulfate)</p> | <p>Mixture<br/>(Water extracts)</p>               | <p>↓serum IgE<br/>↓ear swelling</p>                                                                                                                                                                                                                  | <p>Suppression of IgE-mediated triphasic skin reaction</p>                                                                                                                                           | (90)  |

|                                                                                                                                                                                                                                                                                           |                          |                                                                                                                                                                                                            |                                                 |       |
|-------------------------------------------------------------------------------------------------------------------------------------------------------------------------------------------------------------------------------------------------------------------------------------------|--------------------------|------------------------------------------------------------------------------------------------------------------------------------------------------------------------------------------------------------|-------------------------------------------------|-------|
| <ul style="list-style-type: none"> <li>• Rhizome of <i>Anemarrhena asphodeloides</i> Bunge</li> <li>• Bark of the trunk of <i>Cinnamomum verum</i> J. Presl</li> <li>• Seed of <i>Oryza sativa</i> L.</li> <li>• Root and stolon of <i>Glycyrrhiza uralensis</i> Fisch. ex DC.</li> </ul> |                          |                                                                                                                                                                                                            | Analysis on signaling pathway was not performed |       |
| <b>Qingre-Qushi</b>                                                                                                                                                                                                                                                                       |                          |                                                                                                                                                                                                            |                                                 |       |
| <ul style="list-style-type: none"> <li>• <i>Hedyotis diffusa</i> Willd.</li> <li>• <i>Taraxacum</i> (no specific species was mentioned)</li> <li>• <i>Xanthium sibiricum</i> Patr. ex Widder</li> <li>• <i>Sophora flavescens</i> Aiton</li> </ul>                                        | Mixture (Water extracts) | ↓dermatitis severity<br>↓serum IgE<br>No significant changes in IFN- $\gamma$ & TNF- $\alpha$<br>↓mRNA IL-4 & IL-13<br>↓tissue IL-33 & ST2 (its receptor)<br>↓scratching frequency<br>↓epidermal thickness | Suppression of Th2 cytokines                    | (14)  |
| <b>Yu-Ping-Feng-San</b>                                                                                                                                                                                                                                                                   |                          |                                                                                                                                                                                                            |                                                 |       |
| <ul style="list-style-type: none"> <li>• <i>Astragalus mongholicus</i> Bunge</li> <li>• <i>Atractylodes macrocephala</i> Koidz.</li> <li>• <i>Saposhnikovia divaricata</i> (Turcz. Ex Ledeb.) Schischk.</li> </ul>                                                                        | Mixture (Water extracts) | ↓ear swelling<br>↓serum IgE, IL-4 ↓, IL-5 ↓, IL-13<br>No significant changes in tissue IFN- $\gamma$                                                                                                       | Suppression of Th2 cytokines                    | (148) |
| <b>Yu-Ping-Feng-San</b>                                                                                                                                                                                                                                                                   |                          |                                                                                                                                                                                                            |                                                 |       |
| <ul style="list-style-type: none"> <li>• <i>Astragalus mongholicus</i> Bunge</li> <li>• <i>Atractylodes macrocephala</i> Koidz.</li> </ul>                                                                                                                                                | Mixture (Water extracts) | ↓tissue IL-4, IL-5, IL-9, IL-13<br>↓protein & mRNA TSLP & IL-33<br>↓ear swelling                                                                                                                           | Suppression of Th2 cytokines                    | (138) |

|                                                                                                                                                                                                                                                                             |                          |                                                                                                                                                                                                                                                                                            |                                                                                                                                                                |       |
|-----------------------------------------------------------------------------------------------------------------------------------------------------------------------------------------------------------------------------------------------------------------------------|--------------------------|--------------------------------------------------------------------------------------------------------------------------------------------------------------------------------------------------------------------------------------------------------------------------------------------|----------------------------------------------------------------------------------------------------------------------------------------------------------------|-------|
| <ul style="list-style-type: none"> <li>• <i>Saposhnikovia divaricata</i> (Turcz. ex Ledeb.) Schischk.</li> </ul>                                                                                                                                                            |                          |                                                                                                                                                                                                                                                                                            |                                                                                                                                                                |       |
| Pentaherbs                                                                                                                                                                                                                                                                  |                          |                                                                                                                                                                                                                                                                                            |                                                                                                                                                                |       |
| <ul style="list-style-type: none"> <li>• <i>Lonicera japonica</i> Thunb.</li> <li>• <i>Mentha canadensis</i> L.</li> <li>• <i>Paeonia suffruticosa</i> Andrews</li> <li>• <i>Atractylodes lancea</i> (Thunb.) DC.</li> <li>• <i>Phellodendron amurense</i> Rupr.</li> </ul> | Mixture (Water extracts) | ↓mast cell count<br>↓serum IgE<br>↓skin eosinophils<br>↓serum IL-4 ↓, IL-5 ↓, IL-12<br>↓epidermal thickness                                                                                                                                                                                | Suppression both Th1 & Th2 cytokines<br><br>Analysis on signaling pathway was not performed                                                                    | (131) |
| Hataedock                                                                                                                                                                                                                                                                   |                          |                                                                                                                                                                                                                                                                                            |                                                                                                                                                                |       |
| <ul style="list-style-type: none"> <li>• <i>Glycine max</i> (L.) Merr.</li> <li>• <i>Artemisia caruifolia</i> Buch.-Ham. ex Roxb.</li> <li>• <i>Morus alba</i> L.</li> </ul>                                                                                                | Mixture (Water extracts) | ↓dermatitis severity<br>↓epidermal thickness<br>↑levels of filaggrin, involucrin & loricrin<br>↓papillary dermal edema                                                                                                                                                                     | Restoration in lipid barrier formation and epidermal structures & suppression of epidermal inflammation<br><br>Analysis on signaling pathway was not performed | (64)  |
| Hataedock                                                                                                                                                                                                                                                                   |                          |                                                                                                                                                                                                                                                                                            |                                                                                                                                                                |       |
| <ul style="list-style-type: none"> <li>• <i>Coptis japonica</i> (Thunb.) Makino,</li> <li>• <i>Glycyrrhiza uralensis</i> Fisch. ex DC.</li> </ul>                                                                                                                           | Mixture (Water extracts) | ↓dermatitis severity<br>↓angiogenesis<br>↓epithelial hyperplasia<br>↑filaggrin<br>↑liver X factor (LXR)<br>↓protein kinase C (PKC)<br>↓FcεRI, Substance P, Matrix metalloproteinases (MMP)-9 & 5- hydroxytryptamine (HT)<br>↓tissue IL-4, IL-13, STAT-6 & CD40+<br>↓NFκB p65, p-IκB & iNOS | Suppression of Th2 cytokines via inhibition of NF-κB signaling pathway and restoration of skin barrier                                                         | (12)  |
| Hataedock                                                                                                                                                                                                                                                                   | Mixture                  | ↓dermatitis severity<br>↓protein kinase C (PKC)                                                                                                                                                                                                                                            | Suppression of Th2 cytokines and                                                                                                                               | (11)  |

|                                                                                                                                                                                                                                                                                                                                                                              |                                    |                                                                                                                                                                            |                                                                                            |       |
|------------------------------------------------------------------------------------------------------------------------------------------------------------------------------------------------------------------------------------------------------------------------------------------------------------------------------------------------------------------------------|------------------------------------|----------------------------------------------------------------------------------------------------------------------------------------------------------------------------|--------------------------------------------------------------------------------------------|-------|
| <ul style="list-style-type: none"> <li>• <i>Coptis chinensis</i> Franch.</li> <li>• <i>Glycyrrhiza uralensis</i> Fisch. ex DC.</li> </ul>                                                                                                                                                                                                                                    | (Water extracts)                   | ↑liver X factor (LXR)<br>↓MMP & Substance P<br>↓tissue IL-4<br>↓mast cell degranulation<br>↓epidermal hyperplasia<br>↓tissue TNF- $\alpha$ , p-I $\kappa$ B, iNOS & COX-2  | restoration of skin barrier                                                                |       |
| Soshiho-tang                                                                                                                                                                                                                                                                                                                                                                 |                                    |                                                                                                                                                                            |                                                                                            |       |
| <ul style="list-style-type: none"> <li>• <i>Bupleurum falcatum</i> Linne</li> <li>• <i>Pinellia ternate</i> Breitenbach</li> <li>• <i>Zingiber officinale</i> Roscoe</li> <li>• <i>Scutellaria baicalensis</i> Georgi</li> <li>• <i>Panax ginseng</i> C.A. Meyer</li> <li>• <i>Glycyrrhiza uralensis</i> Fischer</li> <li>• <i>Zizyphus jujube inermis</i> Rehder</li> </ul> | Mixture (Distilled water extracts) | ↓serum IgE,<br>↓serum IL-4<br>↓tissue TNF- $\alpha$ , IL-1 $\beta$ & IL-6<br>↓epidermal & dermal thickness<br>↓ICAM-1 & NF $\kappa$ B expressions                          | Suppression of both Th1 & Th2 cytokines via inhibition of NF- $\kappa$ B signaling pathway | (79)  |
| Gamisasangja-tang                                                                                                                                                                                                                                                                                                                                                            |                                    |                                                                                                                                                                            |                                                                                            |       |
| <ul style="list-style-type: none"> <li>• <i>Stemona sessilifolia</i> (Miq.) Miq.</li> <li>• <i>Spirodela polyrhiza</i> (L.) Schleid.</li> <li>• <i>Cnidium monnieri</i> (L.) Cusson</li> <li>• <i>Sophora flavescens</i> Aiton</li> <li>• <i>Angelica gigas</i> Nakai</li> <li>• <i>Clematis terniflora</i> var. <i>mandshurica</i> (Rupr.) Ohwi</li> </ul>                  | Mixture (Distilled water extracts) | ↓dermatitis severity<br>↓hyperkeratosis & hemorrhage<br>↓mast cell count<br>↓plasma IgE<br>↓total leukocytes<br>↓tissue IL-31, IL-4, IL-5, IL-13<br>↓plasma eotaxin & TARC | Suppression of Th2 cytokines<br><br>Analysis on signaling pathway was not performed        | (106) |

|                                                                                                                                                                                                                                             |                                    |                                                                                                                                                                                                                                                                                                                                                                                             |                                                                                                                                                                        |       |  |
|---------------------------------------------------------------------------------------------------------------------------------------------------------------------------------------------------------------------------------------------|------------------------------------|---------------------------------------------------------------------------------------------------------------------------------------------------------------------------------------------------------------------------------------------------------------------------------------------------------------------------------------------------------------------------------------------|------------------------------------------------------------------------------------------------------------------------------------------------------------------------|-------|--|
| SSC201                                                                                                                                                                                                                                      |                                    |                                                                                                                                                                                                                                                                                                                                                                                             |                                                                                                                                                                        |       |  |
| <ul style="list-style-type: none"> <li>• <i>Stemona japonica</i> (Blume) Miq.</li> <li>• <i>Spirodela polyrhiza</i> (L.) Schleid.</li> <li>• <i>Cnidium monnieri</i> (L.) Cusson</li> </ul>                                                 | Mixture (Distilled water extracts) | <ul style="list-style-type: none"> <li>↓dermatitis severity</li> <li>↓mast cell count</li> <li>↓serum IgE</li> <li>↓blood eosinophils</li> <li>↓serum eotaxin &amp; TARC</li> <li>↓tissue IL-4, IL-5 &amp; IL-13</li> <li>No significant changes of IFN-<math>\gamma</math></li> <li>↓CD4+ &amp; CCR3+</li> <li>↓scratching frequency</li> <li>↓epidermal &amp; dermal thickness</li> </ul> | <ul style="list-style-type: none"> <li>Suppression of Th2 cytokines</li> <li>Analysis on signaling pathway was not performed</li> </ul>                                | (105) |  |
| CP001                                                                                                                                                                                                                                       |                                    |                                                                                                                                                                                                                                                                                                                                                                                             |                                                                                                                                                                        |       |  |
| <ul style="list-style-type: none"> <li>• <i>Houttuynia cordata</i> Thunb</li> <li>• <i>Rehmannia glutinosa</i> (Gaertn.) DC.</li> <li>• <i>Betula platyphylla</i> var. <i>japonica</i></li> <li>• <i>Rubus coreanus</i> Miq.</li> </ul>     | Mixture (Ethanollic extracts)      | <ul style="list-style-type: none"> <li>↓mast cell count</li> <li>↓serum IgE</li> <li>↓mRNA IL-4 &amp; IL-13</li> </ul>                                                                                                                                                                                                                                                                      | <ul style="list-style-type: none"> <li>Suppression of Th2 cytokines</li> <li>Analysis on signaling pathway was not performed</li> </ul>                                | (66)  |  |
| Huang-Lian-Jie-Du                                                                                                                                                                                                                           |                                    |                                                                                                                                                                                                                                                                                                                                                                                             |                                                                                                                                                                        |       |  |
| <ul style="list-style-type: none"> <li>• <i>Coptis chinensis</i> Franch.</li> <li>• <i>Scutellaria baicalensis</i> Georgi</li> <li>• <i>Phellodendron chinense</i> C.K. Schneid.</li> <li>• <i>Gardenia jasminoides</i> J. Ellis</li> </ul> | Mixture (Ethanollic extracts)      | <ul style="list-style-type: none"> <li>↓dermatitis severity</li> <li>↓mast cell count</li> <li>↓serum IgE, IL-4, TNF-<math>\alpha</math> &amp; TSLP</li> <li>↓epidermal thickness</li> <li>↓serum histamine</li> <li>↓MAPKs phosphorylation (p38, JNK and ERK1/2)</li> </ul>                                                                                                                | <ul style="list-style-type: none"> <li>Suppression of both Th1 &amp; Th2 cytokines via inhibition of MAPKs &amp; NF-<math>\kappa</math>B signaling pathways</li> </ul> | (15)  |  |
| Sanpaocao                                                                                                                                                                                                                                   |                                    |                                                                                                                                                                                                                                                                                                                                                                                             |                                                                                                                                                                        |       |  |
| <ul style="list-style-type: none"> <li>• <i>Cardiospermum halicacabum</i> L.</li> <li>• <i>Physalis angulata</i> L.</li> <li>• <i>Ludwigia adscendens</i> (L.) H. Hara</li> </ul>                                                           | Mixture (Ethanollic extracts)      | <ul style="list-style-type: none"> <li>↓serum IgE</li> <li>↓ear swelling &amp; thickening</li> </ul>                                                                                                                                                                                                                                                                                        | <ul style="list-style-type: none"> <li>Suppression of serum IgE level</li> <li>Analysis on signaling pathway was not performed</li> </ul>                              | (121) |  |



|                                                                                                                                                                                                                                                                                                                                                                                      |               |                                                                                                                                                                                                                                                                                                       |                                                                                                                                                                                                                             |       |
|--------------------------------------------------------------------------------------------------------------------------------------------------------------------------------------------------------------------------------------------------------------------------------------------------------------------------------------------------------------------------------------|---------------|-------------------------------------------------------------------------------------------------------------------------------------------------------------------------------------------------------------------------------------------------------------------------------------------------------|-----------------------------------------------------------------------------------------------------------------------------------------------------------------------------------------------------------------------------|-------|
| BuShenYiQi                                                                                                                                                                                                                                                                                                                                                                           |               |                                                                                                                                                                                                                                                                                                       |                                                                                                                                                                                                                             |       |
| <ul style="list-style-type: none"> <li>• <i>Astragalus mongholicus</i> Bunge</li> <li>• <i>Epimedium sagittatum</i> (Siebold &amp; Zucc.) Maxim</li> <li>• <i>Rehmannia glutinosa</i> (Gaertn.) DC.</li> </ul>                                                                                                                                                                       | Mixture (N/A) | <ul style="list-style-type: none"> <li>↓dermatitis severity</li> <li>↓mast cell count</li> <li>↓serum IgE, IL-4 &amp; IL-5</li> <li>↑serum IFN-<math>\gamma</math></li> <li>↓epidermal and dermal thickness</li> <li>↓lymphocyte count</li> <li>↓serum ACTH (hormone) &amp; corticosterone</li> </ul> | <ul style="list-style-type: none"> <li>Suppression of Th2 cytokines and Elevation of Th1 cytokine</li> <li>Analysis on signaling pathway was not performed</li> </ul>                                                       | (68)  |
| Yupingfeng                                                                                                                                                                                                                                                                                                                                                                           |               |                                                                                                                                                                                                                                                                                                       |                                                                                                                                                                                                                             |       |
| <ul style="list-style-type: none"> <li>• <i>Astragalus mongholicus</i> Bunge</li> <li>• <i>Atractylodes macrocephala</i> Koidz.</li> <li>• <i>Saposhnikovia divaricata</i> (Turcz. ex Ledeb.) Schischk.</li> </ul>                                                                                                                                                                   | Mixture (N/A) | <ul style="list-style-type: none"> <li>↓EASI (dermatitis severity)</li> <li>↓epidermal thickness</li> <li>↓TEWL</li> <li>↓ protein AQP3</li> </ul>                                                                                                                                                    | <ul style="list-style-type: none"> <li>Acceleration of wound healing and restoration of skin barrier via down regulation of AQP3 (membrane transporter)</li> <li>Analysis on signaling pathway was not performed</li> </ul> | (147) |
| PTQX                                                                                                                                                                                                                                                                                                                                                                                 |               |                                                                                                                                                                                                                                                                                                       |                                                                                                                                                                                                                             |       |
| <ul style="list-style-type: none"> <li>• <i>Atractylodes macrocephala</i> Koidz.</li> <li>• <i>Pseudostellaria heterophylla</i> (Miq.) Pax</li> <li>• <i>Dioscorea oppositifolia</i> L.</li> <li>• <i>Coix lacryma-jobi</i> var. <i>mayuen</i> (Rom.Caill.) Stapf</li> <li>• <i>Imperata cylindrica</i> (L.) P. Beauv.</li> <li>• <i>Forsythia suspensa</i> (Thunb.) Vahl</li> </ul> | Mixture (N/A) | <ul style="list-style-type: none"> <li>↓dermatitis severity</li> <li>↓ear thickness</li> <li>↓mast cell count</li> <li>↓serum IgE</li> <li>↓epidermal thickness</li> <li>↓scratching frequency</li> <li>↓CD4+ proliferation</li> </ul>                                                                | <ul style="list-style-type: none"> <li>Suppression of mast cell count &amp; serum IgE level</li> <li>Analysis on signaling pathway was not performed</li> </ul>                                                             | (139) |

- *Dictamnus dasycarpus* Turcz.
- Margarita, 0.3g (no specific species)
- *Glycyrrhiza glabra* L.

Taeumjowi-tang

- *Coix lacryma-jobi* var. *mayuen* (Rom.Caill.) Stapf
- *Castanea crenata* Siebold & Zucc.
- *Raphanus raphanistrum* subsp. *sativus* (L.) Domin
- *Schisandra chinensis* (Turcz.) Baill.
- *Platycodon grandiflorus* (Jacq.) A. DC.
- *Acorus gramineus* Aiton
- *Ephedra sinica* Stapf
- *Liriope muscari* (Decne.) L.H. Bailey

Mixture (N/A)

↓dermatitis severity  
 ↓mast cell count  
 ↓serum IgE  
 ↓tissue eosinophils  
 ↓tissue IL-4, TNF- $\alpha$ , IL-6  
 ↓mRNA IL-4, IL-6 & TNF- $\alpha$   
 ↓scratching frequency  
 ↓NF- $\kappa$ B & MAPKs phosphorylation (ERK, JNK & p38)

Suppression of both Th1 & Th2 cytokines via inhibition of NF- $\kappa$ B & MAPKs signaling pathways

(107)

Jianpi Chushi

- *Poria cocos* F.A. Wolf
- *Dioscorea oppositifolia* L.
- *Dictamnus dasycarpus* Turcz.

Mixture (N/A)

↓serum IL-4  
 ↑serum IL-2  
 ↓CD4+ count  
 ↓ear thickness & weight

Suppression of Th2 cytokine and elevation of Th1 cytokine

Analysis on signaling pathway was not performed

(133)

- *Zaocys dhumnade* (no information in Kewscience)
- *Atractylodes lancea* (Thunb.) DC.
- *Citrus aurantium* L.
- *Scutellaria baicalensis* Georgi
- *Sophora flavescens* Aiton
- *Paeonia lactiflora* Pall.
- *Glycyrrhiza glabra* L.

|                                                              |                                  |                                                                                                                                                                                                           |                                                                                                                    |       |
|--------------------------------------------------------------|----------------------------------|-----------------------------------------------------------------------------------------------------------------------------------------------------------------------------------------------------------|--------------------------------------------------------------------------------------------------------------------|-------|
| <i>Astragalus mongholicus</i> Bunge                          | Calycosin (isolated compound)    | ↓mRNA IL-33 & TSLP<br>↓tissue IL-33 & TSLP<br>↓NFκB expression<br>↑occludin & ZO-1 protein                                                                                                                | Suppression of TSLP/IL-33 via inhibition of NF-κB signaling pathway                                                | (129) |
| <i>Rheum officinale</i> Baill.                               | Phycion (isolated compound)      | ↓dermatitis severity<br>↓mast cell count<br>↓serum IgE<br>↓serum TSLP, IL-4, IL-6 & TNF-α<br>↓protein & mRNA TSLP, IL-4 & IL-6                                                                            | Suppression of both Th1 & Th2 cytokines<br><br>Analysis on signaling pathway was not performed                     | (96)  |
| <i>Rumex crispus</i> L.                                      | Chrysophanol (isolated compound) | ↓dermatitis severity<br>↓mast cell count<br>↓serum IgE<br>↓blood eosinophil<br>↓serum TSLP, IL-4, IL-6, IL-13 & TNF-α<br>↑serum IFN-γ<br>↓epidermal thickness<br>↓serum histamine<br>↓scratching duration | Suppression of Th2 cytokines and elevation of Th1 cytokines<br><br>Analysis on signaling pathway was not performed | (37)  |
| <i>Saposhnikovia divaricata</i> (Turcz. ex Ledeb.) Schischk. | Cimifugin (isolated compound)    | ↓ear thickness<br>↓mRNA & protein TSLP, IL-4, IL-5, IL-9 & IL-13 & IL-33<br>No significant changes of IFN-γ<br>↑CLDN1, CLDN-1 & occludin proteins                                                         | Suppression of Th2 cytokines<br><br>Analysis on signaling pathway was not performed                                | (135) |

|                                                                                 |                                        |                                                                                                                                                                                                                                                                                                                                                                               |                                                                                                           |      |
|---------------------------------------------------------------------------------|----------------------------------------|-------------------------------------------------------------------------------------------------------------------------------------------------------------------------------------------------------------------------------------------------------------------------------------------------------------------------------------------------------------------------------|-----------------------------------------------------------------------------------------------------------|------|
| <i>Fraxinus chinensis</i><br>subsp. <i>rhynchophylla</i><br>(Hance) A.E. Murray | Esculetin<br>(isolated<br>compound)    | <ul style="list-style-type: none"> <li>↓mast cell count</li> <li>↓serum IgE</li> <li>↓tissue eosinophil</li> <li>↓TNF-<math>\alpha</math>, IFN-<math>\gamma</math>, IL-4, IL-13,</li> <li>↓IL-31, IL-17A</li> <li>↓epidermal &amp; dermal thickness</li> <li>↓serum histamine</li> <li>↓scratching frequency</li> </ul>                                                       | <p>Suppression of both Th1 &amp; Th2 cytokines</p> <p>Analysis on signaling pathway was not performed</p> | (50) |
| <i>Paeonia</i> $\times$ <i>suffruticosa</i><br>Andrews                          | Paeonol<br>(isolated<br>compound)      | <ul style="list-style-type: none"> <li>↓dermatitis severity</li> <li>↓mast cell count</li> <li>↓serum IgE</li> <li>↓tissue IL-4 &amp; IFN-<math>\gamma</math></li> <li>↓serum IL-4</li> <li>↓mRNA &amp; protein IL-4, IL-13</li> <li>↓scratching frequency</li> <li>↓serum histamine</li> <li>↓epidermal thickness</li> <li>↓MAPKs phosphorylation (p38 &amp; ERK)</li> </ul> | <p>Suppression of both Th1 &amp; Th2 cytokines via inhibition of MAPKs signaling pathway</p>              | (94) |
| <i>Panax ginseng</i> C.A.<br>Mey.                                               | Gintonin<br>(isolated<br>compound)     | <ul style="list-style-type: none"> <li>↓dermatitis severity</li> <li>↓ear thickness</li> <li>↓mast cell count</li> <li>↓serum IgE, IL-4, IFN-<math>\gamma</math></li> <li>↓skin eosinophil</li> <li>↓serum histamine</li> <li>↓serum autotaxin</li> <li>↓epidermal thickness</li> </ul>                                                                                       | <p>Suppression of both Th1 &amp; Th2 cytokines</p> <p>Analysis on signaling pathway was not performed</p> | (75) |
| <i>Persicaria tinctoria</i><br>(Aiton) Spach                                    | Tryptanthrin<br>(isolated<br>compound) | <ul style="list-style-type: none"> <li>↓dermatitis severity</li> <li>↓serum IgE</li> <li>↓mRNA TSLP, IL-4, IFN-<math>\gamma</math>, IL-6, TNF-a &amp; TARC</li> <li>↓protein IL-4 &amp; IL-6</li> <li>↓serum IL-4</li> <li>↓scratching frequency</li> <li>↓epidermal thickness</li> <li>↓serum histamine</li> </ul>                                                           | <p>Suppression of both Th1 &amp; Th2 cytokines</p> <p>Analysis on signaling pathway was not performed</p> | (36) |
| <i>Nigella sativa</i> L.                                                        | Thymoquinone<br>(isolated<br>oil)      | <ul style="list-style-type: none"> <li>↓ear clinical score (dermatitis severity)</li> <li>↓ear thickness &amp; weight</li> <li>↓total leukocyte count</li> <li>↓serum IgE</li> <li>↓mRNA IL-4, IL-5 &amp; IFN-<math>\gamma</math></li> </ul>                                                                                                                                  | <p>Suppression of both Th1 &amp; Th2 cytokines</p>                                                        | (5)  |

---

Analysis on  
signalling pathway  
was not performed

---

N/A: Part of the plant or type of extract was not mentioned
