# Supplementary material for: Management of Atopic Dermatitis Via Oral and Topical Administration of Herbs in Murine Model: A Systematic Review
Source: PubMed Central journal article supplement (PMC9171034; doi:10.3389/fphar.2022.785782), 2022-05-24
Supplement: Table3.pdf [file Table3.pdf]

**Supplementary Table 3:** Study parameters and suggested mechanism (s) of the included topical administration of herb and their active constituents' studies

| Herb Name                                             | Sample Type                            | Experimental Outcomes                                                                                                                                                                                                                       | Proposed mechanism                                                                                                                                  | References |
|-------------------------------------------------------|----------------------------------------|---------------------------------------------------------------------------------------------------------------------------------------------------------------------------------------------------------------------------------------------|-----------------------------------------------------------------------------------------------------------------------------------------------------|------------|
| <i>Isodon inflexus</i> (Thunb.) Kudo                  | Ethanollic extract (Dried whole plant) | ↓dermatitis severity<br>↓scratching, ↓histamine<br>↓ear swelling, ↓epidermal thickness, ↓serotonin<br>↓serum IgE, ↓CORT<br>↓IFN- $\gamma$ , ↓NF- $\kappa$ B, ↓TNF- $\alpha$<br>↓macrophage activation i.e., CD68 & Iba1<br>↓mast cell count | Attenuation of increase stress levels and depression-related hormones via glucocorticoid-related mechanisms                                         | (112)      |
| <i>Gardenia jasminoides</i> J. Ellis                  | Ethanollic extract (Dried whole plant) | ↓scratching, ↓dermatitis severity<br>↓ear thickness, ↑epidermal thickness<br>↓mast cell count<br>↓IL-4, ↓IL-5, ↓IL-13, ↓TNF- $\alpha$<br>↑skin barrier proteins (involucrin & loricrin)                                                     | Restoration of skin barrier function and suppression of Th2 cytokines<br><br>Analysis on signaling pathway was not performed                        | (111)      |
| <i>Morus alba</i> L.                                  | Ethanollic extract (Dried whole plant) | ↓AD-like symptoms,<br>↓dermatitis severity<br>↓cellular infiltration,<br>↓epidermal hyperplasia<br>↓plasma IgE, ↓plasma histamine                                                                                                           | Suppression of TARC production via inhibition of NO and PGE <sub>2</sub> ( <i>in vitro</i> )<br><br>Analysis on signaling pathway was not performed | (85)       |
| <i>Artemisia capillaris</i> Thunb.                    | Ethanollic extract (Dried whole plant) | ↓AD-like symptoms<br>↓dermatitis severity<br>↓mast cell count<br>↓plasma IgE, ↓plasma histamine                                                                                                                                             | Reduction of histamine by inhibiting IgE-mediated mast cell degranulation<br><br>Analysis on signaling pathway was not performed                    | (31)       |
| <i>Saxifraga stolonifera</i> (L) Meeb (Saxifragaceae) | Ethanollic extract (Dried whole plant) | ↓ear thickness, ↓epidermal thickness<br>↓auricle swelling                                                                                                                                                                                   | Suppression of Th2 cytokines and promotion of Th1 cytokines                                                                                         | (143)      |

|                                            |                             |                                                                                                                                                                                                                                                                                          |                                                                                                                              |       |
|--------------------------------------------|-----------------------------|------------------------------------------------------------------------------------------------------------------------------------------------------------------------------------------------------------------------------------------------------------------------------------------|------------------------------------------------------------------------------------------------------------------------------|-------|
|                                            |                             | <p>↓eosinophils, ↓mast cell count,<br/>↓IL-4, ↓IL-6<br/>↓immune organ weight (thymus &amp; spleen)<br/>↑TNF-<math>\alpha</math> &amp; ↑IL-2<br/>No significant changes of IFN-<math>\gamma</math></p>                                                                                    | Analysis on signaling pathway was not performed                                                                              |       |
| <i>Spirodela polyrhiza</i> (L.) Schleid.   | Ethanollic extract (Leaves) | <p>↓mast cell count<br/>↓serum IgE, ↓IL-4, ↓IL-6,<br/>↓TNF-<math>\alpha</math><br/>↑epidermal and dermal hyperplasia<br/>↓NF-<math>\kappa</math>B, ↓I<math>\kappa</math>B<math>\alpha</math>, ↓MAP kinase</p>                                                                            | Suppression of pro-inflammatory mediators via inhibition of MAPK and NF- $\kappa$ B signalling pathways                      | (77)  |
| <i>Alpinia Intermedia</i> Gagnep           | Ethanollic extract (Leaves) | <p>↓AD-like symptoms<br/>↓dermatitis severity<br/>↓TEWL, ↓scratching<br/>↓mast cell degranulation</p>                                                                                                                                                                                    | Abrogation of itch sensation and inhibition of mast cell degranulation                                                       | (2)   |
| <i>Pyrus ussuriensis</i> Maxim.            | Ethanollic extract (Leaves) | <p>↓TEWL, ↑skin hydration<br/>↓erythema, ↓scratching,<br/>↓hypertrophy<br/>↓AD-like symptoms,<br/>↓dermatitis severity<br/>↓serum IgE,<br/>↓cellular infiltration</p>                                                                                                                    | Suppression of pro-inflammatory cytokines<br><br>Analysis on signalling pathway was not performed                            | (17)  |
| <i>Pyrus ussuriensis</i> Maxim.            | Ethanollic Extract (Leaves) | <p>↓TEWL, ↓AD-like symptoms,<br/>↓scratching, ↓dermatitis severity,<br/>↓epidermal thickness<br/>↓serum IgE, ↓IL-1<math>\beta</math><br/>↓mast cell count, ↓cellular infiltration<br/>↑skin barrier proteins (filaggrin &amp; involucrin)</p>                                            | Restoration of skin barrier function & improvement in skin hydration<br><br>Analysis on signalling pathway was not performed | (16)  |
| <i>Urtica thunbergiana</i> Siebold & Zucc. | Ethanollic extract (Leaves) | <p>↓AD-like symptoms, ↓TEWL<br/>↓spleen weight, ↓scratching,<br/>↓epidermal thickness<br/>↑skin hydration, ↓erythema index, ↑filaggrin<br/>↓mast cell count, ↓serum IgE<br/>↓MAPKs phosphorylation (p38, ERK), ↑I<math>\kappa</math>B<math>\alpha</math><br/>↓NFATc1 phosphorylation</p> | Suppression of MAPK/NF- $\kappa$ B signalling pathways                                                                       | (100) |

|                                          |                                    |                                                                                                                                                                                                                                                                                                         |                                                                                                                                                     |       |
|------------------------------------------|------------------------------------|---------------------------------------------------------------------------------------------------------------------------------------------------------------------------------------------------------------------------------------------------------------------------------------------------------|-----------------------------------------------------------------------------------------------------------------------------------------------------|-------|
| <i>Broussonetia kazinoki</i> Siebold     | Ethanollic extract (Leaves)        | <p>↓AD-like symptoms,<br/>↓dermatitis score<br/>↓dermal thickness, ↓epidermal thickness<br/>↓mast cell count<br/>↓serum IgE, ↓IL-4</p>                                                                                                                                                                  | <p>Inhibition of Th2 response via suppression of TARC and MDC binding to CCR4</p> <p>Analysis on signaling pathway was not performed</p>            | (76)  |
| <i>Wikstroemia indica</i> (L.) C.A. Mey. | Ethanollic extract (Stem & Leaves) | <p>↓AD-like symptoms, ↓epidermal thickness<br/>↑skin hydration, ↓TEWL<br/>↓mast cell count<br/>↓serum IgE, ↓IL-4</p>                                                                                                                                                                                    | <p>Inhibition of IL-4 over expression</p> <p>Analysis on signaling pathway was not performed</p>                                                    | (83)  |
| <i>Angelica sinensis</i> (Oliv.) Diels   | Ethanollic extract (Roots)         | <p>↓epidermal &amp; dermal thickness,<br/>↓mast cell count, ↓scratching<br/>↓serum IgE, ↓substance P<br/>↓IL-4, ↓IL-6, ↓TNF-<math>\alpha</math>, ↓IFN-<math>\gamma</math><br/>↓NF-<math>\kappa</math>B, ↓p-I<math>\kappa</math>B<math>\alpha</math><br/>↓MAPKs phosphorylation (p38, ERK &amp; JNK)</p> | <p>Suppression of Th1 &amp; Th2 cytokines and down-regulation of substance P</p>                                                                    | (78)  |
| <i>Inula helenium</i> L.                 | Ethanollic extract (Roots)         | <p>↓dermatitis score, ↓right ear swelling<br/>↓epidermal thickness, ↓dermal thickness<br/>↓cellular infiltration<br/>↓serum IgE, ↓TNF-<math>\alpha</math>, ↓IFN-<math>\gamma</math><br/>↓IL-4, ↓IL-5, ↓IL-13</p>                                                                                        | <p>Down-regulation of Th1/Th2 -associated cytokines</p> <p>Analysis on signaling pathway was not performed</p>                                      | (134) |
| <i>Tribulus terrestris</i> L.            | Ethanollic extract (Fruits)        | <p>↓AD-like symptoms, ↓TEWL<br/>↓dermatitis severity<br/>↓eosinophil &amp; ↓mast cell count<br/>↓Orai-1 channel</p>                                                                                                                                                                                     | <p>Modulation of calcium ion channel and suppression of mast cell count</p>                                                                         | (57)  |
| <i>Juniperus rigida</i> Siebold & Zucc.  | Ethanollic extract (Fruits)        | <p>↓TEWL, ↓AD-like symptoms<br/>↓lymphocyte infiltration,<br/>↑ skin hydration<br/>↓ear thickness,<br/>↓epidermal thickness<br/>↓serum IgE &amp; IL-4</p>                                                                                                                                               | <p>Restoration of skin barrier function and suppression of serum IgE and IL-4 production</p> <p>Analysis on signaling pathway was not performed</p> | (82)  |

|                                         |                               |                                                                                                                                                                                                     |                                                                                                                                                                   |       |
|-----------------------------------------|-------------------------------|-----------------------------------------------------------------------------------------------------------------------------------------------------------------------------------------------------|-------------------------------------------------------------------------------------------------------------------------------------------------------------------|-------|
| <i>Gardenia jasminoides</i> J. Ellis    | Ethanollic extract (Fruits)   | <p>↓dermatitis severity, ↓ear thickness</p> <p>↓epidermal thickness, ↓histamine, ↓total IgE</p> <p>↓mast cell count</p> <p>↓serum IL-4, ↓IL-6, ↓TNF-<math>\alpha</math></p> <p>↓ICAM-1, ↓VCAM-1</p> | <p>Suppression in the production of pro-inflammatory cytokines &amp; expression of adhesion molecules</p> <p>Analysis on signalling pathway was not performed</p> | (125) |
| <i>Forsythia Suspensa</i> (Thunb.) Vahl | Ethanollic extract (Fruits)   | <p>↓AD-like symptoms</p> <p>↓dermatitis severity</p> <p>↓ear thickness, ↓epidermal thickness, ↓serum IgE</p> <p>↓mast cell count</p> <p>↓mRNA IL-4, IFN-<math>\gamma</math></p>                     | <p>Suppression of Th2 response, down-regulation of IgE-mediated mast cell activation</p> <p>Analysis on signalling pathway was not performed</p>                  | (124) |
| <i>Dioscorea quinqueloba</i> Thunb.     | Ethanollic extract (Rhizomes) | <p>↓ear swelling, ↓lymphocyte infiltration</p> <p>↓ear thickness, ↓epidermal thickness</p> <p>↓serum IgE, ↓IL-4, ↓TEWL</p> <p>↓skin surface pH, ↓epidermal hyperplasia</p>                          | <p>Suppression of serum IgE &amp; Th2 cytokine</p> <p>Analysis on signalling pathway was not performed</p>                                                        | (48)  |
| <i>Coptis chinensis</i> Franch.         | Ethanollic extract (Rhizomes) | <p>↓scratching, ↓spleen weight</p> <p>↓AD-like symptoms, ↓dermatitis severity</p> <p>↓skin thickness, ↓serum IgE, ↓IL-4</p>                                                                         | <p>Inhibition of apoptosis of keratinocytes by reducing key protein expressions (<i>in vitro</i>)</p> <p>Analysis on signalling pathway was not performed</p>     | (137) |
| <i>Pterocarpus santalinus</i> L.f.      | Ethanollic extract (Bark)     | <p>↓epidermal thickness, ↓TEWL</p> <p>↓skin hypertrophy, ↓eosinophil</p> <p>↓mast cell count, ↓serum IgE, ↑serum IgG2a</p> <p>↓TNF-<math>\alpha</math>, ↓IL-4, ↓PGE<sub>2</sub></p>                 | <p>Regulation of serum levels of IgE and IgG2a, along with suppression of Th1 and Th2 cytokines</p> <p>Analysis on signaling pathway was not performed</p>        | (33)  |

|                                                                  |                                            |                                                                                                                                                                                                              |                                                                                                                                                          |       |
|------------------------------------------------------------------|--------------------------------------------|--------------------------------------------------------------------------------------------------------------------------------------------------------------------------------------------------------------|----------------------------------------------------------------------------------------------------------------------------------------------------------|-------|
| <i>Stellera chamaejasme</i> L.                                   | Ethanollic extract<br>(Dried aerial parts) | ↓AD-like symptoms, ↑skin hydration, ↓TEWL<br>↑lymphocyte infiltration<br>↓ear thickness, ↓epidermal thickness<br>↑mast cell count, ↓mast cell degranulation<br>↓serum IgE, ↓IL-4                             | Restoration of skin barrier function and inhibition of IL-4 expression<br><br>Analysis on signaling pathway was not performed                            | (52)  |
| <i>Centella asiatica</i> (L.) Urb.                               | Ethanollic extract<br>(Dried aerial parts) | ↓lymph node weight, ↓AD-like symptoms<br>↓ear thickness, ↓epidermal thickness<br>↓serum IgE, ↓IL-4, ↓IL-13<br>↓TNF- $\alpha$ , ↓IL-1 $\beta$ , ↓COX-2, ↓iNOS, ↓p50/p65 translocation                         | Suppression of pro-inflammatory mediators via inhibition of NF- $\kappa$ B signaling pathway                                                             | (44)  |
| <i>Quercus mongolica</i> subsp. <i>crispula</i> (Blume) Menitsky | Ethanollic extract<br>(Acorn shell)        | ↓AD-like symptoms, ↑skin hydration, ↓TEWL<br>↓ear thickness, ↓epidermal thickness<br>↓mast cell count, ↓eosinophil infiltration<br>↓serum IgE, ↓IL-4<br>↓ mRNA IL-25, ↓IL-33, ↓TNF- $\alpha$ , ↓IL-1 $\beta$ | Down-regulation of serum IgE levels and inhibition of mRNA gene expression of Th2-type cytokines<br><br>Analysis on signalling pathway was not performed | (81)  |
| <i>Cucumis melo</i> L.                                           | Ethanollic extract<br>(Fruit pulp)         | ↓AD-like symptoms, ↓dermatitis severity<br>↓epidermal hyperplasia<br>↓mast cell count<br>↓plasma IgE, ↓plasma histamine                                                                                      | Suppression of IgE<br><br>Detailed analysis on signalling pathway was not performed                                                                      | (32)  |
| <i>Panax ginseng</i> C.A. Mey.                                   | Methanollic Extract<br>(N/A)               | ↓P-p70S6K<br>↓p-mTOR                                                                                                                                                                                         | Inhibition of p70S6K phosphorylation in infiltrating basophils                                                                                           | (104) |
| <i>Acer tegmentosum</i> Maxim.                                   | Methanollic extract<br>(Bark)              | ↓dermatitis severity<br>↓dermal thickness, ↓epidermal thickness<br>↓dermal mast cells count, ↓IL-4, ↓IL-5, ↓IL-13<br>↓serum IgE, ↓TARC<br>↓TSLP (mRNA expression & production)                               | Restoration of Th1/Th2 balance by reducing TSLP production<br><br>Analysis on signaling pathway was not performed                                        | (140) |
| <i>Cyperus rotundus</i> L.                                       | Methanollic extract<br>(Rhizomes)          | ↓dermatitis severity, ↓epidermal thickness<br>↓cellular infiltration, ↓hyperkeratosis                                                                                                                        | Restoration of skin barrier function, inhibition of IgE and                                                                                              | (142) |

|                                                                                                                                                                                               |                                                      |                                                                                                                                                                                                                            |                                                                                                                                         |       |
|-----------------------------------------------------------------------------------------------------------------------------------------------------------------------------------------------|------------------------------------------------------|----------------------------------------------------------------------------------------------------------------------------------------------------------------------------------------------------------------------------|-----------------------------------------------------------------------------------------------------------------------------------------|-------|
|                                                                                                                                                                                               |                                                      | <p>↓scratching, ↑filaggrin,<br/>↓Serum IgE<br/>↓IL-6, ↓IL-1β, ↓IL-13</p>                                                                                                                                                   | <p>pro-inflammatory<br/>cytokine production</p> <p>Analysis on signaling<br/>pathway was not<br/>performed</p>                          |       |
| <i>Persicaria tinctoria</i><br>(Aiton) Spach                                                                                                                                                  | Distilled water<br>extract<br>(Dried whole<br>plant) | <p>↓AD-like symptoms,<br/>↓epidermal thickness<br/>↓scratching<br/>↓cellular infiltration<br/>↓TSLP, ↓histamine<br/>↓serum IgE, ↓IL-4, ↓IL-6</p>                                                                           | <p>Blockade of caspase-<br/>1/receptor-interacting<br/>protein 2 pathway in<br/>stimulated mast cells</p>                               | (38)  |
| <i>Vincetoxicum atratum</i> (Bunge) C.<br>Morren & Decne.                                                                                                                                     | Distilled water<br>extract<br>(Roots)                | <p>↓scratching<br/>↓epidermal &amp; dermal thickness,<br/>↓serum IgE, ↓skin mast cell<br/>↓IL-4, ↓IL-6, ↓TNF-α, ↓IL-1β<br/>↓NF-κB, ↓IκBα, ↓MAPK</p>                                                                        | <p>Suppression of pro-<br/>inflammatory<br/>mediators and Th2<br/>response via inhibition<br/>MAPK and NF-κB<br/>signaling pathways</p> | (23)  |
| <i>Pseudostellaria heterophylla</i><br>(Miq.) Pax                                                                                                                                             | Distilled water<br>extract<br>(Roots)                | <p>↓dermal thickness, ↓epidermal<br/>thickness<br/>↓mast cell count, ↓serum IgE,<br/>↓CD4<sup>+</sup> T-cell recruitment<br/>↓IL-4, ↓IL-6, ↓IL-8<br/>↓IL-1β, ↓TNF-α, ↓IFN-γ<br/>↓p-IκBα, ↓p-JNK, ↓p-ERK1/2,<br/>↓p-p38</p> | <p>Suppression of<br/>MAPK/NF-κB<br/>signaling pathways</p>                                                                             | (21)  |
| <i>Rosa multiflora</i><br>Thunb.                                                                                                                                                              | Acetone<br>extract<br>(Roots)                        | <p>↓AD-like symptoms<br/>↓dermatitis severity<br/>↓iNOS, ↓COX-2,<br/>↓eosinophil ratio<br/>↓serum IgE, ↑IL-10<br/>↓IL-4, ↓IL-5, ↓IL-13</p>                                                                                 | <p>Suppression of Th2<br/>response via<br/>activation of Treg</p> <p>Analysis on signaling<br/>pathway was not<br/>performed</p>        | (110) |
| C2RLP                                                                                                                                                                                         |                                                      |                                                                                                                                                                                                                            |                                                                                                                                         |       |
| <ul style="list-style-type: none"> <li>• <i>Rosa multiflora</i><br/>Thunb.</li> <li>• <i>Lespedeza bicolor</i><br/>Turcz.</li> <li>• <i>Platycladus orientalis</i><br/>(L.) Franco</li> </ul> | Mixture<br>(Ethanollic<br>extracts)                  | <p>↓dermatitis severity,<br/>↓cellular infiltration<br/>↓epidermal hyperplasia<br/>↓IL-4, ↓nitrite (NO), ↓PGE2,<br/>↓TARC</p>                                                                                              | <p>Suppression of Th2<br/>cytokines and pro-<br/>inflammatory<br/>mediators</p>                                                         | (92)  |

|                                                                                                                                                                                                                                                                                                                                   |                               |                                                                                                                                                                                                                                      |                                                                                                                                            |      |
|-----------------------------------------------------------------------------------------------------------------------------------------------------------------------------------------------------------------------------------------------------------------------------------------------------------------------------------|-------------------------------|--------------------------------------------------------------------------------------------------------------------------------------------------------------------------------------------------------------------------------------|--------------------------------------------------------------------------------------------------------------------------------------------|------|
| <ul style="list-style-type: none"> <li>• <i>Castanea crenata</i> Siebold &amp; Zucc.</li> <li>• <i>Cornus officinalis</i> Siebold &amp; Zucc.</li> </ul>                                                                                                                                                                          |                               |                                                                                                                                                                                                                                      |                                                                                                                                            |      |
| <p>Dangguibohyul-Tang</p> <ul style="list-style-type: none"> <li>• <i>Astragalus mongholicus</i> Bunge</li> <li>• <i>Angelica sinensis</i> (Oliv.) Diels</li> </ul>                                                                                                                                                               | Mixture (Ethanollic extracts) | <p>↓AD-like symptoms, ↓scratching<br/>↓dermal thickness, ↓epidermal thickness<br/>↓mast cell count, ↓serum IgE<br/>↓IL-4, ↓IL-6, ↓IL-1β, ↓TNF-α,<br/>↓IFN-γ<br/>↓NF-κB, ↓p- IκBα<br/>↓MAPKs phosphorylation (p38, ERK &amp; JNK)</p> | Suppression of both Th1 & Th2 cytokine production via the inhibition of MAPK and NF-κB signalling pathways                                 | (22) |
| <p>Danggui Buxue Tang</p> <ul style="list-style-type: none"> <li>• <i>Astragalus mongholicus</i> Bunge</li> <li>• <i>Angelica sinensis</i> (Oliv.) Diels</li> </ul>                                                                                                                                                               | Mixture (Ethanollic extracts) | <p>↓AD-like symptoms, ↓ear swelling<br/>↓epidermal thickness,<br/>↓eosinophil infiltration<br/>↓mast cell count, ↓serum IgE,<br/>↓IgG1<br/>↓IL-4, ↓TNF-α</p>                                                                         | Suppression of Th1 & Th2 cytokines<br><br>Analysis on signalling pathway was not performed                                                 | (28) |
| <p>KAJD</p> <ul style="list-style-type: none"> <li>• <i>Phellodendron amurense</i> Rupr.</li> <li>• <i>Sesamum indicum</i> L.</li> <li>• <i>Sophora flavescens</i> Aiton</li> <li>• <i>Glycyrrhiza glabra</i> L.</li> <li>• <i>Ophiopogon japonicus</i> (Thunb.) Ker Gawl.</li> <li>• <i>Radix rehmanniae</i> Exsiccat</li> </ul> | Mixture (Water extracts)      | <p>↓AD-like symptoms,<br/>↓CD4<sup>+</sup> T-cell recruitment<br/>↓mast cell count, ↓eosinophil count<br/>↓serum IgE<br/>↓IL-6, ↓IL-10, ↓IL-12</p>                                                                                   | Suppression of Th2 response by controlling transcriptional expression of cytokines<br><br>Analysis on signalling pathway was not performed | (42) |

|                                                                                                                                                                                                                                                                                                        |                                 |                                                                                                                                                                                                                                                                                                                                                                                                               |                                                                                                                                                                       |              |
|--------------------------------------------------------------------------------------------------------------------------------------------------------------------------------------------------------------------------------------------------------------------------------------------------------|---------------------------------|---------------------------------------------------------------------------------------------------------------------------------------------------------------------------------------------------------------------------------------------------------------------------------------------------------------------------------------------------------------------------------------------------------------|-----------------------------------------------------------------------------------------------------------------------------------------------------------------------|--------------|
| <p>Pentaherbs</p> <ul style="list-style-type: none"> <li>• <i>Lonicera japonica</i> Thunb.</li> <li>• <i>Mentha canadensis</i> L.</li> <li>• <i>Paeonia</i> × <i>suffruticosa</i> Andrews</li> <li>• <i>Atractylodes lancea</i> (Thunb.) DC.</li> <li>• <i>Phellodendron amurense</i> Rupr.</li> </ul> | <p>Mixture (Water extracts)</p> | <p>↓ear redness, ↓ear swelling (only ORAL)<br/>↓epidermal thickness,<br/>↓eosinophil infiltration<br/>↓mast cell count<br/>↓serum IL-5, ↓IL-12</p>                                                                                                                                                                                                                                                            | <p>Inhibition of pro-inflammatory cytokine production, IL-12 &amp; eosinophil activator, IL-5</p> <p>Analysis on signalling pathway was not performed</p>             | <p>(131)</p> |
| <p>Huang-Lian-Jie-Du-Tang (HLJDT)</p> <ul style="list-style-type: none"> <li>• <i>Coptis chinensis</i> Franch</li> <li>• <i>Scutellaria baicalensis</i> Georgi</li> <li>• <i>Phellodendron amurense</i> Rupr.</li> <li>• <i>Gardenia jasminoides</i> J Ellis</li> </ul>                                | <p>Mixture (Water extracts)</p> | <p>↓AD-like symptoms, ↓cellular infiltration<br/>↓ear swelling, ↓hyperkeratosis<br/>↓IL-2, ↓IL-4, ↓IL-5, ↓IL-6<br/>↓IL-1<math>\alpha</math>, ↓IL-1<math>\beta</math>, ↓NF-<math>\kappa</math>B<br/>↓I<math>\kappa</math>B-<math>\alpha</math>, ↓IFN-<math>\gamma</math>, ↓TNF-<math>\alpha</math><br/>↓CD4<sup>+</sup>/CD8<sup>+</sup> T-lymphocyte ratio<br/>↓MAPKs phosphorylation (p38, ERK &amp; JNK)</p> | <p>Suppression of pro-inflammatory mediators via inhibition of MAPKs, I<math>\kappa</math>B-<math>\alpha</math> &amp; NF-<math>\kappa</math>B signalling pathways</p> | <p>(27)</p>  |
| <p>Si-Ni-San</p> <ul style="list-style-type: none"> <li>• <i>Bupleurum chinense</i> DC.</li> <li>• <i>Paeonia lactiflora</i> Pall.</li> <li>• <i>Glycyrrhiza uralensis</i> Fisch. ex DC.</li> <li>• <i>Citrus aurantium</i> L.</li> </ul>                                                              | <p>Mixture (Water extracts)</p> | <p>↓AD-like symptoms, ↓cellular infiltration<br/>↓IL-2, ↓IL-4, ↓IL-6<br/>↓IL-1<math>\alpha</math>, ↓IL-1<math>\beta</math>, ↓TNF-<math>\alpha</math><br/>↓CD4<sup>+</sup>/CD8<sup>+</sup> T-lymphocyte ratio, ↓epidermal hyperplasia,<br/>↓I<math>\kappa</math>B-<math>\alpha</math>, ↓NF-<math>\kappa</math>B<br/>↓MAPKs phosphorylation (p38, ERK &amp; JNK)</p>                                            | <p>Suppression of MAPKs signalling pathway activation</p>                                                                                                             | <p>(26)</p>  |
| <p>Atofreillage</p>                                                                                                                                                                                                                                                                                    |                                 | <p>↓dermal thickness, ↓epidermal thickness</p>                                                                                                                                                                                                                                                                                                                                                                | <p>Regulation of IgE and histamine production</p>                                                                                                                     | <p>(67)</p>  |



|                                                                                                                                                                                                                                                                                                                                                                                                                                                                                                            |                                    |                                                                                                                                                                                                   |                                                                      |
|------------------------------------------------------------------------------------------------------------------------------------------------------------------------------------------------------------------------------------------------------------------------------------------------------------------------------------------------------------------------------------------------------------------------------------------------------------------------------------------------------------|------------------------------------|---------------------------------------------------------------------------------------------------------------------------------------------------------------------------------------------------|----------------------------------------------------------------------|
| <ul style="list-style-type: none"> <li>• <i>Rhus javanica</i> Linne</li> <li>• <i>Kochi scoparia</i> Schrader</li> <li>• <i>Cnidium monnieri</i> (L.) Cusson</li> <li>• <i>Houttuynia cordata</i> Thunb.</li> <li>• <i>Nepeta tenuifolia</i> Benth.</li> <li>• <i>Sophora flavescens</i> Aiton</li> <li>• <i>Rheum palmatum</i> L.</li> <li>• <i>Lithospermum erythrorhizon</i> Siebold &amp; Zucc.</li> <li>• <i>Terminalia chebula</i> Retz.</li> <li>• <i>Trichosanthes kirilowii</i> Maxim.</li> </ul> | Mixture (Distilled water extracts) | <p>↓mast cell count, ↓leukocyte count</p> <p>↓serum IgE, ↓serum histamine</p> <p>↓IL-4, ↓IL-5, ↓IL-13</p> <p>↓IL-6, ↓IL-1β, ↓TNF-α, ↓NF-κB</p> <p>↓MAPKs phosphorylation (p38, ERK &amp; JNK)</p> | by inhibition of Th2 response via MAPK and NF-κB signalling pathways |
|------------------------------------------------------------------------------------------------------------------------------------------------------------------------------------------------------------------------------------------------------------------------------------------------------------------------------------------------------------------------------------------------------------------------------------------------------------------------------------------------------------|------------------------------------|---------------------------------------------------------------------------------------------------------------------------------------------------------------------------------------------------|----------------------------------------------------------------------|

|                                                                                                                                         |                                        |                                                                                                                                                                                               |                                                                                                                                                                                                                                                           |       |
|-----------------------------------------------------------------------------------------------------------------------------------------|----------------------------------------|-----------------------------------------------------------------------------------------------------------------------------------------------------------------------------------------------|-----------------------------------------------------------------------------------------------------------------------------------------------------------------------------------------------------------------------------------------------------------|-------|
| <ul style="list-style-type: none"> <li>• <i>Aucklandia costus</i> Falc.</li> <li>• <i>Platycladus orientalis</i> (L.) Franco</li> </ul> | Mixture (1,3-butylene glycol extracts) | <p>↓AD-like symptoms</p> <p>↓dermis thickness</p> <p>↓epidermal thickness</p> <p>↓eosinophil,</p> <p>↓mast cell count</p> <p>↓serum IgE, ↓IL-4, ↓IL-13</p> <p>↓ mRNA TNF- α &amp; ↓IFN- γ</p> | <p><u>SC</u>: Suppression of IFN- γ &amp; TNF- α activation by inhibiting STAT1 phosphorylation</p> <p><u>TOL</u>: Suppression of pro-inflammatory cytokines mainly TNF- α and IL-1β</p> <p>Detailed analysis on signalling pathway was not performed</p> | (141) |
|-----------------------------------------------------------------------------------------------------------------------------------------|----------------------------------------|-----------------------------------------------------------------------------------------------------------------------------------------------------------------------------------------------|-----------------------------------------------------------------------------------------------------------------------------------------------------------------------------------------------------------------------------------------------------------|-------|

|                                                                                                                                                                   |                                                            |                                                                                                                                                                                          |                                                                                                                                                                 |              |
|-------------------------------------------------------------------------------------------------------------------------------------------------------------------|------------------------------------------------------------|------------------------------------------------------------------------------------------------------------------------------------------------------------------------------------------|-----------------------------------------------------------------------------------------------------------------------------------------------------------------|--------------|
| <p>Jawoongo</p> <ul style="list-style-type: none"> <li>• <i>Arnebia euchroma</i> (Royle ex Benth.) I.M. Johnst.</li> <li>• <i>Angelica gigas</i> Nakai</li> </ul> | <p>Mixture (N/A)</p>                                       | <p>↓skin thickness, ↓WBCs<br/>↓mast cell count<br/>↓serum IgE, ↓IL-6, ↓IL-10,<br/>↓IL-12, ↓IL-2, ↓IL-4, ↓IL-13,<br/>↓TNF-α</p>                                                           | <p>Down-regulation of serum IgE levels and suppression of Th1 &amp; Th2 cytokines</p> <p>Analysis on signalling pathway was not performed</p>                   | <p>(70)</p>  |
| <p><i>Stewartia pseudocamellia</i> Maxim.</p>                                                                                                                     | <p>5,6-dihydroergosterol-glucoside (isolated compound)</p> | <p>↓lymph node weight, ↓spleen weight<br/>↓AD-like symptoms, ↓epidermal thickness<br/>↓eosinophil, ↓mast cell count<br/>↓CCL17, ↓CCL22<br/>↓histamine, ↓total IgE</p>                    | <p>Suppression in the production of Th2 chemokines</p> <p>Analysis on signalling pathway was not performed</p>                                                  | <p>(55)</p>  |
| <p><i>Ophiopogon japonicus</i> (Thunb.) Ker Gawl.</p>                                                                                                             | <p>Ophiopogonin D (isolated compound)</p>                  | <p>↓epidermal thickness, ↓spleen weight<br/>↓IL-4, ↓IL-5, ↓IL-13, ↓eotaxin<br/>↓TNF-α, ↓IFN-γ, ↓IL-1β mRNA<br/>↓mast cell count</p>                                                      | <p>Suppression of mast cell activation and inhibition of mRNA gene expression of Th2-type cytokines</p> <p>Analysis on signalling pathway was not performed</p> | <p>(4)</p>   |
| <p><i>Fritillaria usuriensis</i> Maxim.</p>                                                                                                                       | <p>Peiminine (isolated compound)</p>                       | <p>↓epidermal thickness, ↓dermal thickness<br/>↓eosinophil, ↓mast cell count<br/>↓serum IgE, ↓IL-4, ↓IL-6, ↓IL-13<br/>↓NF-κB, ↓TNF-α<br/>↓MAPKs phosphorylation (p38, ERK &amp; JNK)</p> | <p>Suppression of pro-inflammatory mediators via inhibition of NF-κB &amp; MAPK signalling pathways</p>                                                         | <p>(88)</p>  |
| <p><i>Artemisia scoparia</i> Waldst. et Kitaib</p>                                                                                                                | <p>3,5-dicaffeoyl-epi-quinic acid (isolated compound)</p>  | <p>↓AD-like symptoms, ↓scratching<br/>↓epidermal thickness<br/>↓mast cell count, ↓eosinophil infiltration<br/>↓serum histamine, ↓serum IgE<br/>↓TNF-α, ↓caspase-1 activation</p>         | <p>Regulation of caspase-1 signalling pathways</p>                                                                                                              | <p>(115)</p> |
| <p><i>Blainvillea acmella</i> (L.) Philipson</p>                                                                                                                  | <p>Spilanthol (isolated compound)</p>                      | <p>↓ear thickness, ↓collagen deposition<br/>↓mast cell count, ↓eosinophils<br/>↓serum IgE, ↓IgG1, ↑IgG2a<br/>↓MAPK proteins, ↓COX-2,<br/>↓iNOS</p>                                       | <p>Restoration of Th1/Th2 balance, inhibition of MAPK pathway and mast cell infiltration</p>                                                                    | <p>(46)</p>  |

|                                                         |                                                               |                                                                                                                                                                                                                           |                                                                                                                                                               |       |
|---------------------------------------------------------|---------------------------------------------------------------|---------------------------------------------------------------------------------------------------------------------------------------------------------------------------------------------------------------------------|---------------------------------------------------------------------------------------------------------------------------------------------------------------|-------|
| Soy isoflavone daidzin                                  | 7,8,4'-<br><i>Trihydroxyisoflavone</i><br>(isolated compound) | ↓AD-like symptoms,<br>↓dermatitis severity, ↓TEWL<br>↓ear thickness, ↓epidermal hypertrophy, ↓scratching<br>↓serum IgE, ↓eosinophil,<br>↓mast cell count, ↓TARC<br>↓IL-4, ↓IL-5, ↓IL-13<br>↓IL-12, ↓IFN- $\gamma$         | Suppression of Th1 & Th2 cytokines<br><br>Analysis on signalling pathway was not performed                                                                    | (63)  |
| <i>Gardenia jasminoides</i> J. Ellis                    | Crocin<br>(isolated compound)                                 | ↓dermatitis severity, ↓eosinophil<br>↓mast cell count<br>↓ear thickness, ↓epidermal thickness, ↓serum IgE<br>↓IL-4, ↓IL-5, ↓IL-13<br>↓TARC, ↓p-STAT6, ↓I $\kappa$ B $\alpha$                                              | Suppression of Th2 response via inhibition of NF- $\kappa$ B /STAT6 signalling pathways                                                                       | (123) |
| <i>Stellera chamaejasme</i> L.                          | Stechamone<br>(isolated compound)                             | ↓stratum corneum thickness<br>↓dermal thickness, ↓lymphocyte infiltration<br>↓mast cell count<br>↓mast cell densities, ↓TEWL<br>↓serum IgE, ↓IL-4                                                                         | Inhibition of IL-4 expression, regulation of IgE synthesis and suppression of mast cell degranulation<br><br>Analysis on signalling pathway was not performed | (52)  |
| <i>Alpinia officinarum</i> Hance                        | Galangin<br>(isolated compound)                               | ↓dermal thickness, ↓epidermal thickness<br>↓eosinophil, ↓mast cell count<br>↓total IgE, ↓DfE-specific IgE, ↓IgG2a<br>↓IL-4, ↓IL-5, ↓IL-13<br>↓IL-31, ↓IL-32, ↓IFN- $\gamma$                                               | Suppression of Th1 & Th2 cytokines, with IL-32 as its target<br><br>Analysis on signalling pathway was not performed                                          | (19)  |
| <i>Artemisia</i> species<br>(Species was not mentioned) | Eupatilin<br>(isolated compound)                              | ↓AD-like symptoms, ↓ear thickness,<br>↓skin barrier protein expression (filaggrin & loricrin)<br>↓serum IgE, ↓IL-4, ↑PPAR- $\alpha$<br>↓ mRNA TNF- $\alpha$ , ↓IFN- $\gamma$ , TSLP<br>↓mRNA IL-25, ↓IL-33, ↓IL-1 $\beta$ | Suppression of Th2 cytokines & IL-33 mRNA expression<br><br>Suppression of TARC inflammation via the inhibition of TSLP cytokine expression                   | (56)  |

|                                      |                                  |                                                                                                                                                                                                                                                                                                              |                                                                                                 |      |
|--------------------------------------|----------------------------------|--------------------------------------------------------------------------------------------------------------------------------------------------------------------------------------------------------------------------------------------------------------------------------------------------------------|-------------------------------------------------------------------------------------------------|------|
|                                      |                                  |                                                                                                                                                                                                                                                                                                              | Analysis on signalling pathway was not performed                                                |      |
| Origin of the herb was not mentioned | Quercetin (compound)             | ↓epidermal thickness, ↓hyperplasia<br>↓IL-4, ↓IL-6, ↓CCL17, ↓CCL22<br>↓IFN- $\gamma$ , ↓TNF- $\alpha$<br>↓mast cell count                                                                                                                                                                                    | Suppression of Th1 & Th2 cytokines via TLR2 and TLR6 signalling pathway                         | (45) |
| <i>Nigella sativa</i> L.             | Thymoquinone (isolated oil)      | ↓ear clinical score (dermatitis severity)<br>↓ear thickness & weight<br>↓total leukocyte count<br>↓serum IgE<br>↓mRNA IL-4, IL-5 & IFN- $\gamma$                                                                                                                                                             | Suppression of both Th1 & Th2 cytokines<br><br>Analysis on signalling pathway was not performed | (5)  |
| <i>Labiatae</i> or mint family       | (R)- (+)-Pulegone (isolated oil) | ↓AD-like symptoms, ↓scratching<br>↓dermal thickness, ↓epidermal thickness<br>↓mast cell count, ↓total IgE,<br>↓nerve growth factor<br>↓IL-4, ↓IL-6, ↓IL-1 $\beta$ , ↓TNF- $\alpha$ ,<br>↓IFN- $\gamma$<br>↓MAPKs phosphorylation (p38, ERK & JNK)<br>↓p- I $\kappa$ B $\alpha$ / I $\kappa$ B $\alpha$ ratio | Suppression MAPK/NF- $\kappa$ B signalling pathways and cytokine production                     | (24) |

N/A: Part of the plant or type of extract was not mentioned
