# Supplementary material for: Management of Atopic Dermatitis Via Oral and Topical Administration of Herbs in Murine Model: A Systematic Review
Source: PubMed Central journal article supplement (PMC9171034; doi:10.3389/fphar.2022.785782), 2022-05-24
Supplement: Table4.pdf [file Table4.pdf]

**Supplementary Table 4:** The preparation and chemical analysis of the topical treatments of herbs and their active constituents

| Species/compound, source, concentration                                                                                                                                                                                          | Quality control reported? (Y/N)                                                                                                                                                                                        | Chemical analysis reported? (Y/N) | Purity (%) [For compound only] | References |
|----------------------------------------------------------------------------------------------------------------------------------------------------------------------------------------------------------------------------------|------------------------------------------------------------------------------------------------------------------------------------------------------------------------------------------------------------------------|-----------------------------------|--------------------------------|------------|
| Whole plant of <i>Isodon inflexus</i> (Thunb.) Kudo, [CheonBuk National University, Jeonju, Korea)], 100 g<br><br>Voucher specimen (no. KIOM 53) was deposited at the herbarium of the Mibyeong Research Center at the KIOM      | Y- Extracted two times in 1 L of 70% ethanol for 120 min followed by filtration through filter paper (Whatman No. 1). After filtration, specimens were concentrated under reduced pressure. Extracts were lyophilized. | Y- HPLC                           | N/A                            | (112)      |
| Whole plant of <i>Gardenia jasminoides</i> J. Ellis, [Mega Herb, Co. (CheonBuk, Korea)], 100 g<br><br>Voucher specimen (no. KIOM 32/KIOM 51) was deposited at the herbarium of the Herbal Medicine Research Division at the KIOM | Y- Extracted in 1 L of 70% ethanol for 120 min followed by filtration. The extract was dried under reduced pressure.                                                                                                   | Y- HPLC                           | N/A                            | (111)      |
| Whole plant of <i>Morus alba</i> L., [HMAX (Jecheon, Korea)], 200 g<br><br>Voucher specimen (2008-ST12) has been deposited in the Basic Herbal Medicine Research Group, Korea Institute of Oriental Medicine                     | Y- Extracted three times with 70% ethanol by sonication for 60 min. The extract was filtered, evaporated to dryness, and freeze-dried                                                                                  | N                                 | N/A                            | (85)       |
| Whole plant of <i>Artemisia capillaris</i> Thunb., [Kwangmyungdang Medicinal herbs (Ulsan, Korea)], 300g                                                                                                                         | Y- Extracted with 70% EtOH by sonication for 60 min. The extract solution was filtered through Whatman No. 2 filter paper and evaporated to dryness.                                                                   | Y- HPLC                           | N/A                            | (31)       |

|                                                                                                                                                                                                                       |                                                                                                                                             |             |     |       |
|-----------------------------------------------------------------------------------------------------------------------------------------------------------------------------------------------------------------------|---------------------------------------------------------------------------------------------------------------------------------------------|-------------|-----|-------|
| Voucher specimen (AC-2009-EBM30) has been deposited at the Herbal Medicine Formulation Research Group at the Korea Institute of Oriental Medicine                                                                     |                                                                                                                                             |             |     |       |
| Whole plant of <i>Saxifraga stolonifera</i> (L) Meeb (Saxifragaceae), [Zunyi Jishi Pharmaceutical Co., Ltd. China], 500 g<br><br>Lot no. 20150725                                                                     | Y- Pulverized to fine powder, degreased to colorless by petroleum ether and then dried, extracted twice with 60% EtOH at 80°C.              | N           | N/A | (143) |
| Leaves of <i>Spirodela polyrhiza</i> (L.) Schleid., [Jungdo Pharm. INC (Seoul, Korea)], 30 g<br><br>No voucher specimen or batch number was mentioned                                                                 | Y- Shaken in 70% ethanol for 24h at room temperature. The extract was filtered, concentrated in a rotary vacuum evaporator and lyophilized. | Y- HPLC-DAD | N/A | (77)  |
| Leaves of <i>Alpinia intermedia</i> Gagnep., [Gray Art (Tokyo, Japan)]<br><br>No information on the concentration of the herb<br><br>No voucher specimen or batch number was mentioned                                | Y- Chopped and boiled, and the evaporated fractions were retrieved and diluted in water.                                                    | N           | N/A | (2)   |
| Leaves of <i>Pyrus ussuriensis</i> Maxim., [Hwacheon-gun in the Gangwon-do Province of South Korea], 5 kg<br><br>Voucher Number SU-160706001 was deposited at herbarium of Sungkyunwan University, Suwon, South Korea | Y- Powdered, soaked in 70% ethanol for three days, extracted, filtered and concentrated using a rotary evaporator.                          | Y- HPLC     | N/A | (17)  |
| Leaves of <i>Pyrus ussuriensis</i> Maxim.                                                                                                                                                                             | Y- 70% EtOH total extract was fractionated with                                                                                             | Y- HPLC     | N/A | (16)  |

|                                                                                                                   |                                                                                                                                                                                                                                                             |            |     |       |
|-------------------------------------------------------------------------------------------------------------------|-------------------------------------------------------------------------------------------------------------------------------------------------------------------------------------------------------------------------------------------------------------|------------|-----|-------|
| No information of the supplier and the concentration of the herb                                                  | hexane, chloroform, ethyl acetate, n-butanol and water. The solvents were then evaporated and freeze-dried. Further, the chloroform fraction was separated using stepwise gradient elution of ethyl acetate-methanol in a silica gel column chromatography. |            |     |       |
| No voucher specimen or batch number was mentioned                                                                 |                                                                                                                                                                                                                                                             |            |     |       |
| Leaves of <i>Urtica thunbergiana</i> Siebold & Zucc., [Luvama Nature Co., Ltd. (Gyeonggi-do, Korea)], 5 g         | Y- Extracted using 50% ethanol in a digital orbital shaker for 24 h at 24–25°C three times. After incubation, the extract was filtered and evaporated under vacuum at 40°C.                                                                                 | N          | N/A | (100) |
| No voucher specimen or batch number was mentioned                                                                 |                                                                                                                                                                                                                                                             |            |     |       |
| Leaves of <i>Broussonetia kazinoki</i> Siebold, [Chun-Yang Paper Corporation of Jeonbuk, Province, Korea], 4.5 kg | Y- Chopped into small pieces and extracted with 70% ethanol with reflux for 4 hours. The extracted solution was filtered and evaporated under reduced pressure.                                                                                             | N          | N/A | (76)  |
| Voucher specimen (JSI0862) was deposited at the Jeonju Biomaterials Institute                                     |                                                                                                                                                                                                                                                             |            |     |       |
| Stems and leaves of <i>Wikstroemia indica</i> (L.) C.A.Mey., [Zobra village, Hathazari Upazila, Chittagong], 4 kg | Y- Chopping them into small millimeter-sized pieces. The plants prepared were extracted with 95% ethanol and concentrated to dryness in vacuum.                                                                                                             | Y- HPLC/MS | N/A | (83)  |
| Voucher specimen (PNU-0026) was deposited at the Medicinal Herb Garden of Pusan National University               |                                                                                                                                                                                                                                                             |            |     |       |
| Roots of <i>Angelica sinensis</i> (Oliv.) Diels, [Jungdo Herb (Seoul, Korea)], 30 g                               | Y- Cut into small pieces and extracted with 70% ethanol for 24h at room temperature. The filtrate was concentrated under                                                                                                                                    | Y- HPLC    | N/A | (78)  |
| Voucher specimen (#E70AS) was deposited in                                                                        |                                                                                                                                                                                                                                                             |            |     |       |

|                                                                                                                           |                                                                                                                                                                                      |                |     |       |  |
|---------------------------------------------------------------------------------------------------------------------------|--------------------------------------------------------------------------------------------------------------------------------------------------------------------------------------|----------------|-----|-------|--|
| the herbarium of the Department of Convergence Korean Medical Science                                                     | reduced pressure using Whatman filter paper no. 3. The resultant solutions were concentrated in a rotary evaporator, freeze-dried for three days.                                    |                |     |       |  |
| Roots of <i>Inula helenium</i> L., [Anguo county, Hebei province, China]                                                  | N                                                                                                                                                                                    | N              | N/A | (134) |  |
| No information on the concentration of the herb                                                                           |                                                                                                                                                                                      |                |     |       |  |
| Voucher specimen (No. 2013.09.22) was deposited in the herbarium of Second Military Medical University                    |                                                                                                                                                                                      |                |     |       |  |
| Fruits of <i>Tribulus terrestris</i> L., [Medicinal Materials Company (Omniherb, Kyungsan, Korea)], 200 g                 | Y- Extracted with 30% ethanol for 3 h, filtered through Whatman Grade 1 filter paper, concentrated under a vacuum rotary evaporator at 60°C, and then lyophilized in a freeze-dryer. | Y-HPLC         | N/A | (57)  |  |
| Voucher specimens (No. 2016-TF-E30) were deposited in the Herbarium of the College of Korean Medicine, Dongguk University |                                                                                                                                                                                      |                |     |       |  |
| Fruits of <i>Juniperus rigida</i> Siebold & Zucc., [Kyung-Dong Herb market (Seoul, Korea)], 900 g                         | Y- Extracted with 95% ethanol and evaporated under reduced pressure.                                                                                                                 | Y- Q-TOF LC/MS | N/A | (82)  |  |
| Voucher specimen (PNU-0021) has been deposited in the Medicinal Herb Garden, Pusan National University                    |                                                                                                                                                                                      |                |     |       |  |
| Fruits of <i>Gardenia jasminoides</i> J.Ellis, [Omniherb Co. (Yeoungcheon, Korea)], 250.54 g                              | Y- Soaked three times in 70% ethanol in an ultrasonic bath for 90 min. This residue was filtered and evaporated in vacuum.                                                           | Y- HPLC        | N/A | (125) |  |

|                                                                                                                                   |                                                                                                                                                            |               |     |       |
|-----------------------------------------------------------------------------------------------------------------------------------|------------------------------------------------------------------------------------------------------------------------------------------------------------|---------------|-----|-------|
| Voucher specimen (No. 000599) was deposited in the herbarium of the Department of Herbal Resources Research at the KIOM           |                                                                                                                                                            |               |     |       |
| Fruits of <i>Forsythia suspensa</i> (Thunb.) Vahl, [Omniherb Co. (Yeoungcheon, Korea)], 50 g                                      | Y- Soaked three times in 70% ethanol in an ultrasonic bath for 60 min. The ethanol supernatants were combined, filtered, and evaporated in vacuum.         | Y- HPLC       | N/A | (124) |
| Voucher specimen (No. KIOM-78039) was deposited in the herbarium of the Department of Herbal Resources Research at the KIOM       |                                                                                                                                                            |               |     |       |
| Rhizomes of <i>Dioscorea quinquelobata</i> Thunb., [JirisanHanbang Food® (Sancheong, Gyeongnam, South Korea)], 20 kg              | Y- Extracted with 95% EtOH and evaporated under reduced pressure.                                                                                          | Y- HPLC/MS    | N/A | (48)  |
| Voucher specimen (PNU-0023) has been deposited in the Medicinal Herb Garden, Pusan National University                            |                                                                                                                                                            |               |     |       |
| Rhizomes of <i>Coptis chinensis</i> Franch., [Good Agricultural Practices Demonstration Base in Shizhu (Chongqing, China)], 10 kg | Y- Pulverized and soaked with 95% ethanol at room temperature. The extract was concentrated to give a residue.                                             | Y- HPLC & NMR | N/A | (137) |
| No voucher specimen or batch number was mentioned                                                                                 |                                                                                                                                                            |               |     |       |
| Barks of <i>Pterocarpus santalinus</i> L.f., [Kyungdong Oriental Market (Seoul, South Korea)], 1 kg                               | Y- Refluxed with boiling 50% ethanol for 3 h. The extract was filtered using Whatman No. 1 filter paper, dried under vacuum and subsequently freeze-dried. | Y- HPLC/MS    | N/A | (33)  |
| Voucher specimen (D-1016) was deposited                                                                                           |                                                                                                                                                            |               |     |       |

|                                                                                                                                              |                                                                                                                                                                         |            |     |      |
|----------------------------------------------------------------------------------------------------------------------------------------------|-------------------------------------------------------------------------------------------------------------------------------------------------------------------------|------------|-----|------|
| at the Korea Institute of Science and Technology (KIST)-Gangneung Institute, Gangneung, South Korea                                          |                                                                                                                                                                         |            |     |      |
| Aerials of <i>Stellera chamaejasme</i> L., [Yunnan province, Diqing prefecture, Xiang Ge Li Ra, China], 6.11 kg                              | Y- Extracted with 95% ethanol and evaporated under reduced pressure.                                                                                                    | Y- HPLC/MS | N/A | (52) |
| Voucher specimen (PNU-0023) was deposited at the Medicinal Herb Garden, Pusan National University                                            |                                                                                                                                                                         |            |     |      |
| Aerials of <i>Centella asiatica</i> (L.) Urb., 1 kg                                                                                          | Y- Extracted with ethanol at room temperature. The extracts were filtrated with depth-filter coated with active carbon and concentrated at 80°C under reduced pressure. | N          | N/A | (44) |
| No information of the supplier                                                                                                               |                                                                                                                                                                         |            |     |      |
| No voucher specimen or batch number was mentioned                                                                                            |                                                                                                                                                                         |            |     |      |
| Acorn shell of <i>Quercus mongolica</i> subsp. <i>crispula</i> (Blume) Menitsky, [Wonju, Gangwon-do area in Korea], 46.5 g                   | Y- Extracted thrice with 95% and evaporated under vacuum.                                                                                                               | Y- HPLC    | N/A | (81) |
| Voucher specimen (SN20151001) has been deposited at the Natural Products Research Institute of the Korea Institute of Science and Technology |                                                                                                                                                                         |            |     |      |
| Fruit pulps of <i>Cucumis melo</i> L., [Kwangmyungdang Medicinal herbs (Ulsan, Korea)], 300 g                                                | Y- Extracted with 70% ethanol by sonication for 60 min. The extract solution was filtered through a filter paper and evaporated to dryness using a rotary evaporator.   | N          | N/A | (32) |
| Voucher specimen (2009-EBM9) has been deposited at the Herbal Medicine                                                                       |                                                                                                                                                                         |            |     |      |

| Formulation Research<br>Group at the Korea Institute<br>of Oriental Medicine                                           |                                                                                                                                                                                                                                                                                       |          |     |       |
|------------------------------------------------------------------------------------------------------------------------|---------------------------------------------------------------------------------------------------------------------------------------------------------------------------------------------------------------------------------------------------------------------------------------|----------|-----|-------|
| <i>Panax ginseng</i> C.A.Mey.,<br>[Ohki Pharmaceutical Co.,<br>Ltd. (Tokyo, Japan)], 500 g                             | Y- Crushed and refluxed for<br>2 h twice in 70% methanol.<br>The filtrate was evaporated<br>to dryness under reduced<br>pressure.                                                                                                                                                     | N        | N/A | (104) |
| No information on the part<br>of the herb                                                                              |                                                                                                                                                                                                                                                                                       |          |     |       |
| No voucher specimen or<br>batch number was<br>mentioned                                                                |                                                                                                                                                                                                                                                                                       |          |     |       |
| Barks of <i>Acer tegmentosum</i><br>Maxim., [Hamyang County,<br>Gyeongsangnamdo,<br>Republic of Korea], 1.2 kg         | Y- Extracted twice in<br>methanol for 2h in a reflux<br>apparatus. After reflux and<br>filtration, the extract was<br>evaporated in vacuum and<br>lyophilized.                                                                                                                        | Y- HPLC  | N/A | (140) |
| No voucher specimen or<br>batch number was<br>mentioned                                                                |                                                                                                                                                                                                                                                                                       |          |     |       |
| Rhizomes of <i>Cyperus</i><br><i>rotundus</i> L., [oriental<br>Medicines market<br>(KyungDong, Seoul,<br>Korea)], 3 kg | Y- Chopped and extracted<br>twice with methanol under<br>reflux for 3 h to yield the<br>crude extract.                                                                                                                                                                                | Y- GC-MS | N/A | (142) |
| Voucher specimen<br>(DKH-02561) was<br>deposited at the Ministry of<br>Food and Drug Safety,<br>Korea                  |                                                                                                                                                                                                                                                                                       |          |     |       |
| Whole plants of <i>Persicaria</i><br><i>tinctoria</i> (Aiton) Spach,<br>[Naju city, republic of<br>Korea]              | Y- Dipped in water for 3<br>days. Lime was put in the<br>water and the water was<br>stirred until the color was<br>changed into indigo blue.<br>After indigo dye sank,<br>supernatant which was<br>changed clearly was<br>drained. The indigo dye<br>sunk like mud is named<br>Niram. | Y- HPLC  | N/A | (38)  |
| No information on the<br>concentration of the herb                                                                     |                                                                                                                                                                                                                                                                                       |          |     |       |
| No voucher specimen or<br>batch number was<br>mentioned                                                                |                                                                                                                                                                                                                                                                                       |          |     |       |
| Roots of <i>Vincetoxicum</i><br><i>atratum</i> (Bunge) C. Morren                                                       | Y- Extracted with distilled<br>water at room temperature<br>for 24 h. Then, the extract                                                                                                                                                                                               | N        | N/A | (23)  |

|                                                                                                                                                                                                                                                                                                                |                                                                                                                                                                                                   |          |     |       |
|----------------------------------------------------------------------------------------------------------------------------------------------------------------------------------------------------------------------------------------------------------------------------------------------------------------|---------------------------------------------------------------------------------------------------------------------------------------------------------------------------------------------------|----------|-----|-------|
| <p>&amp; Decne., [Jung-do Herb Inc. (Seoul, Korea)], 100 g</p>                                                                                                                                                                                                                                                 | <p>was filtered using 0.22 mL filter and concentrated under reducing pressure.</p>                                                                                                                |          |     |       |
| <p>Voucher specimen (CA_root_2013) was deposited at Korean Medicine at Kyung Hee University</p>                                                                                                                                                                                                                |                                                                                                                                                                                                   |          |     |       |
| <p>Roots of <i>Pseudostellaria heterophylla</i> (Miq.) Pax, [Herb Inc. (Guri, Korea)], 100 g</p>                                                                                                                                                                                                               | <p>Y- Extracted with distilled water for 24 h at room temperature. Following filtration, the extracted solution was concentrated in a rotary evaporator, freeze-dried for three days.</p>         | N        | N/A | (21)  |
| <p>Voucher specimens (no. PH131201) were stored in the College of Pharmacy of Kyung Hee University</p>                                                                                                                                                                                                         |                                                                                                                                                                                                   |          |     |       |
| <p>Roots of <i>Rosa multiflora</i> Thunb., [Gyeongdong Market (Seoul, Korea)], 2.5 kg</p>                                                                                                                                                                                                                      | <p>Y- Extracted three times with 80% acetone at room temperature. After removing the acetone under vacuum, the residual aqueous solution was filtered and the filtrate was then concentrated.</p> | Y- HPLC  | N/A | (110) |
| <p>Voucher specimen (RMR2008) was deposited at the herbarium of the College of Pharmacy, Chung-Ang University, Korea</p>                                                                                                                                                                                       |                                                                                                                                                                                                   |          |     |       |
| <p>C2RLP</p> <ul style="list-style-type: none"> <li>• <i>Cornus officinalis</i> Siebold &amp; Zucc.</li> <li>• <i>Rosa multiflora</i> Thunb.</li> <li>• <i>Lespedeza bicolor</i> Turcz.</li> <li>• <i>Platycladus orientalis</i> (L.) Franco</li> <li>• <i>Castanea crenata</i> Siebold &amp; Zucc.</li> </ul> | <p>Y- Dried and crushed parts of each plant (4:1:1:1:1) were boiled in 30% ethanol. The extracts were filtered with Whatman filter paper Number 1, evaporated to dryness and freeze-dried.</p>    | Y- LC/MS | N/A | (92)  |
| <p>[Gyeongbuk Forest Resource Development Institute, the Republic of Korea]</p>                                                                                                                                                                                                                                |                                                                                                                                                                                                   |          |     |       |



---

No information on the concentration of the herbs

Voucher specimens (LVPPM 2001 – 2005) were deposited at Kyungpook National University, Republic of Korea

---

|                                                                                                                                                       |                                                                                                                                                |         |     |      |
|-------------------------------------------------------------------------------------------------------------------------------------------------------|------------------------------------------------------------------------------------------------------------------------------------------------|---------|-----|------|
| Dangguibohyul-Tang                                                                                                                                    | Y- Herbs (5:1) were extracted with 70% ethanol for 24 h. The extracts were filtered, concentrated and lyophilized then mixed well in a vortex. | Y- HPLC | N/A | (22) |
| <ul style="list-style-type: none"><li>• <i>Astragalus mongholicus</i> Bunge, 7.5 g</li><li>• <i>Angelica sinensis</i> (Oliv.) Diels, 11.2 g</li></ul> |                                                                                                                                                |         |     |      |

No information of the supplier

Voucher specimen (# AM001 and # AS070) was deposited in the herbarium of the College of Korean Medicine, Kyung Hee University, Republic of Korea

---

|                                                                                                                                                      |                                                                                                                                                                 |   |     |      |
|------------------------------------------------------------------------------------------------------------------------------------------------------|-----------------------------------------------------------------------------------------------------------------------------------------------------------------|---|-----|------|
| Danggui Buxue Tang                                                                                                                                   | Y- Herbs (5:1) were soaked in water and boiled for 60 minutes. Then, extracts were centrifuged and the supernatants were lyophilized and mixed with excipients. | N | N/A | (28) |
| <ul style="list-style-type: none"><li>• <i>Astragalus mongholicus</i> Bunge, 100 g</li><li>• <i>Angelica sinensis</i> (Oliv.) Diels, 100 g</li></ul> |                                                                                                                                                                 |   |     |      |

[Gansu and Shanxi province, China]

No voucher specimen or batch number was mentioned

---

|                                                                                                                                                                     |   |         |     |      |
|---------------------------------------------------------------------------------------------------------------------------------------------------------------------|---|---------|-----|------|
| KAJD                                                                                                                                                                | N | Y- HPLC | N/A | (42) |
| <ul style="list-style-type: none"><li>• <i>Phellodendron amurense</i> Rupr.</li><li>• <i>Sesamum indicum</i> L.</li><li>• <i>Sophora flavescens</i> Aiton</li></ul> |   |         |     |      |

---

- *Glycyrrhiza glabra* L.
- *Ophiopogon japonicus* (Thunb.) Ker Gawl.
- *Radix rehmanniae* Exsiccat

[Hanpoong Pharm and Foods Company (Jeon-ju, Korea)]

No information on the concentration and the ratio of the herbs

No voucher specimen or batch number was mentioned

|                                                                                                                                                                                                                                                                                                                |                                                                                                                                                                                                          |         |     |       |
|----------------------------------------------------------------------------------------------------------------------------------------------------------------------------------------------------------------------------------------------------------------------------------------------------------------|----------------------------------------------------------------------------------------------------------------------------------------------------------------------------------------------------------|---------|-----|-------|
| Pentaherbs                                                                                                                                                                                                                                                                                                     | Y- Herbs (2:1:2:2:2) were extracted by refluxing in boiling water at 100°C for 1h. Extraction was repeated twice to obtain total water crude extract. The filtered extract was freeze-dried into powder. | Y- HPLC | N/A | (131) |
| <ul style="list-style-type: none"> <li>• <i>Lonicera japonica</i> Thunb., 5 g</li> <li>• <i>Mentha canadensis</i> L., 2.5g</li> <li>• <i>Paeonia</i> × <i>suffruticosa</i> Andrews, 5 g</li> <li>• <i>Atractylodes lancea</i> (Thunb.) DC., 5 g</li> <li>• <i>Phellodendron amurense</i> Rupr., 5 g</li> </ul> |                                                                                                                                                                                                          |         |     |       |

No information of the supplier

No voucher specimen or batch number was mentioned

|                                                                                                                                                  |                                                                                                                           |         |     |      |
|--------------------------------------------------------------------------------------------------------------------------------------------------|---------------------------------------------------------------------------------------------------------------------------|---------|-----|------|
| Huang-Lian-Jie-Du-Tang (HLJDT)                                                                                                                   | Y- Boiling these components in water three times. Then, the solution was collected and concentrated by water-evaporation. | Y- HPLC | N/A | (27) |
| <ul style="list-style-type: none"> <li>• <i>Coptis chinensis</i> Franch., 15 g</li> <li>• <i>Scutellaria baicalensis</i> Georgi, 10 g</li> </ul> |                                                                                                                           |         |     |      |

- *Phellodendron amurense* Rupr., 10 g
- *Gardenia jasminoides* J. Ellis, 15 g

[Zisun Herbal  
Pharmaceutical Company  
Ltd. (China)]

No information on the ratio  
of the herbs

No voucher specimen or  
batch number was  
mentioned

|                                                                                                                                                                                                                                                  |                                                                                                                                                                                                                        |         |     |      |
|--------------------------------------------------------------------------------------------------------------------------------------------------------------------------------------------------------------------------------------------------|------------------------------------------------------------------------------------------------------------------------------------------------------------------------------------------------------------------------|---------|-----|------|
| Si-Ni-San                                                                                                                                                                                                                                        | Y- Herbs (1:1:1:1) were soaked in water for 30 min and then boiled for 30 min. The extract was collected and the residue was boiled in water two more times as above. Then, the extracts were pooled and concentrated. | Y- HPLC | N/A | (26) |
| <ul style="list-style-type: none"> <li>• <i>Bupleurum chinense</i> DC., 10 g</li> <li>• <i>Paeonia lactiflora</i> Pall., 10 g</li> <li>• <i>Glycyrrhiza uralensis</i> Fisch. ex DC., 10 g</li> <li>• <i>Citrus aurantium</i> L., 10 g</li> </ul> |                                                                                                                                                                                                                        |         |     |      |

[Zisun Herbal  
Pharmaceutical Co. Ltd.  
(Guangzhou, Guang Dong,  
China)]

No voucher specimen or  
batch number was  
mentioned

|                                                                                                                                                                                                                                                 |                                                                                                                                                                                                                                     |         |     |      |
|-------------------------------------------------------------------------------------------------------------------------------------------------------------------------------------------------------------------------------------------------|-------------------------------------------------------------------------------------------------------------------------------------------------------------------------------------------------------------------------------------|---------|-----|------|
| Atofreillage                                                                                                                                                                                                                                    | Y- Dried individual herbs were mixed in distilled water at 100°C and the extraction procedure was repeated with water then centrifuged for 30 min at 1500g and the supernatant was lyophilized using a vacuum-freeze-drying system. | Y- HPLC | N/A | (67) |
| <ul style="list-style-type: none"> <li>• <i>Rhus javanica</i> Linne, 100 g</li> <li>• <i>Kochi scoparia</i> Schrader, 100 g</li> <li>• <i>Cnidium monnieri</i> (L.) Cusson, 100 g</li> <li>• <i>Houttuynia cordata</i> Thunb., 100 g</li> </ul> |                                                                                                                                                                                                                                     |         |     |      |

- 
- *Nepeta tenuifolia*  
Benth., 100 g
  - *Sophora flavescens*  
Aiton, 100 g
  - *Rheum palmatum* L.,  
100 g
  - *Lithospermum*  
*erythrorhizon*  
Siebold & Zucc.,  
100 g
  - *Terminalia chebula*  
Retz., 100 g
  - *Trichosanthes*  
*kirilowii* Maxim.,  
100 g

[Jeong-Seong Oriental  
Pharmacy Store (Daejeon,  
Korea)]

No information on the ratio  
of the herbs

No voucher specimen or  
batch number was  
mentioned

- 
- |                                                                                                                                                            |                                                                                                                                                                                                      |                           |            |              |
|------------------------------------------------------------------------------------------------------------------------------------------------------------|------------------------------------------------------------------------------------------------------------------------------------------------------------------------------------------------------|---------------------------|------------|--------------|
| <ul style="list-style-type: none"> <li>• <i>Aucklandia costus</i><br/>Falc.</li> <li>• <i>Platycladus</i><br/><i>orientalis</i> (L.)<br/>Franco</li> </ul> | <p>Y- Extracted with 1, 3-<br/>butylene in an ultrasonic<br/>extractor at room<br/>temperature for 12 h and<br/>filtered. The filtrates were<br/>centrifuged and the<br/>supernatants were used.</p> | <p>Y- UPLC-<br/>MS/MS</p> | <p>N/A</p> | <p>(141)</p> |
|------------------------------------------------------------------------------------------------------------------------------------------------------------|------------------------------------------------------------------------------------------------------------------------------------------------------------------------------------------------------|---------------------------|------------|--------------|

[Kyung-Dong Herb market  
(Seoul, Korea)]

No information on the  
concentration and the ratio  
of the herbs

Voucher specimens  
University (No. 2014-05  
and No. 2014-06) were  
deposited at the herbarium  
of Department of Food &  
Nutrition, Hoseo University

---

|                                                                                                                                                              |   |                                |       |       |
|--------------------------------------------------------------------------------------------------------------------------------------------------------------|---|--------------------------------|-------|-------|
| Jawoongo                                                                                                                                                     | N | Y- HPLC                        | N/A   | (70)  |
| <ul style="list-style-type: none"> <li>• <i>Arnebia euchroma</i><br/>(Royle ex Benth.)<br/>I.M.Johnst.</li> <li>• <i>Angelica gigas</i><br/>Nakai</li> </ul> |   |                                |       |       |
| [Han-poong Pharm Co., Ltd.<br>(Jeonjoo, Republic of<br>Korea)]                                                                                               |   |                                |       |       |
| No information on the<br>concentration and the ratio<br>of the herbs                                                                                         |   |                                |       |       |
| No voucher specimen or<br>batch number was<br>mentioned                                                                                                      |   |                                |       |       |
| 5,6-dihydroergosterol-<br>glucoside                                                                                                                          | N | N                              | N     | (55)  |
| No information of the<br>supplier and the<br>concentration of the<br>compound                                                                                |   |                                |       |       |
| Ophiopogonin D                                                                                                                                               | N | Y-<br>UPLC/ESI-<br>QTOF-<br>MS | N     | (4)   |
| [Chemfaces (Wuhan<br>Chemfaces Biochemical<br>Co., Ltd., China)]                                                                                             |   |                                |       |       |
| No information on the<br>concentration of the<br>compound                                                                                                    |   |                                |       |       |
| Peiminine                                                                                                                                                    | N | N                              | ≥ 98% | (88)  |
| [Abcam (Cambridge, UK)]                                                                                                                                      |   |                                |       |       |
| No information on the<br>concentration of the<br>compound                                                                                                    |   |                                |       |       |
| 3,5-dicaffeoyl-epi-quinic<br>acid                                                                                                                            | N | N                              | N     | (115) |

|                                                                      |                                                                                                                                                                                                                                                           |         |   |       |
|----------------------------------------------------------------------|-----------------------------------------------------------------------------------------------------------------------------------------------------------------------------------------------------------------------------------------------------------|---------|---|-------|
| [Korea Maritime University]                                          |                                                                                                                                                                                                                                                           |         |   |       |
| No information on the concentration of the compound                  |                                                                                                                                                                                                                                                           |         |   |       |
| Spilanthol                                                           | N                                                                                                                                                                                                                                                         | N       | N | (46)  |
| [ChromaDex, Irvine, CA, USA]                                         |                                                                                                                                                                                                                                                           |         |   |       |
| No information on the concentration of the compound                  |                                                                                                                                                                                                                                                           |         |   |       |
| 7,8,4'-Trihydroxyisoflavone                                          | N                                                                                                                                                                                                                                                         | N       | N | (63)  |
| No information of the supplier and the concentration of the compound |                                                                                                                                                                                                                                                           |         |   |       |
| Crocin                                                               | N                                                                                                                                                                                                                                                         | N       | N | (123) |
| [Sigma Aldrich Co. (St. Louis, MO, USA)]                             |                                                                                                                                                                                                                                                           |         |   |       |
| No information on the concentration of the compound                  |                                                                                                                                                                                                                                                           |         |   |       |
| Stechamone                                                           | Y- Extracted with 95% ethanol and the extract obtained was then evaporated under reduced pressure, suspended in distilled water. The ethyl acetate fraction was then chromatographed to yield 13 fractions. Stechamone was obtained by recrystallization. | Y- HPLC | N | (52)  |
| [Yunnan province (Diqing prefecture, Xiang Ge Li Ra, China)]         |                                                                                                                                                                                                                                                           |         |   |       |
| No information on the concentration of the compound                  |                                                                                                                                                                                                                                                           |         |   |       |
| Galangin                                                             | N                                                                                                                                                                                                                                                         | N       | N | (19)  |
| [Sigma (St. Louis, MO)]                                              |                                                                                                                                                                                                                                                           |         |   |       |
| No information on the concentration of the compound                  |                                                                                                                                                                                                                                                           |         |   |       |
| Eupatilin                                                            | N                                                                                                                                                                                                                                                         | N       | N | (56)  |

---

[Phytochemicals Online  
(www.phytopurify.com)]

No information on the  
concentration of the  
compound

---

|           |   |   |       |      |
|-----------|---|---|-------|------|
| Quercetin | N | N | ≥ 98% | (45) |
|-----------|---|---|-------|------|

---

[Nanjing  
Goren Bio-Technology Co.,  
Ltd. (Nanjing, China)]

No information on the  
concentration of the  
compound

---

|              |   |   |       |     |
|--------------|---|---|-------|-----|
| Thymoquinone | N | N | ≥ 98% | (5) |
|--------------|---|---|-------|-----|

---

[Sigma Aldrich (US)]

No information on the  
concentration of the  
compound

---

|          |   |   |   |      |
|----------|---|---|---|------|
| Pulegone | N | N | N | (24) |
|----------|---|---|---|------|

---

[Sigma-Aldrich Chemical  
Co. (MO, USA)]

No information on the  
concentration of the  
compound

---

HPLC-DAD: High-Performance Liquid Chromatography Diode Array Detector, GC-MS: Gas Chromatography-Mass Spectrometry, KIOM: Korea Institute of Oriental Medicine
